# 1 Decoding Genetics, Ancestry, and Geospatial Context for Precision Health

2 Satoshi Koyama M.D., Ph.D.<sup>1,2,3</sup>, Ying Wang M.D., Ph.D.<sup>1,4,5</sup>, Kaavya Paruchuri M.D.<sup>1,2,3</sup>, Md Mesbah Uddin  
3 Ph.D.<sup>1,2</sup>, So Mi J. Cho Ph.D.<sup>1,2,6</sup>, Sarah M. Urbut M.D., Ph.D.<sup>1,2</sup>, Sara Haidermota B.S.<sup>1,2</sup>, Whitney E.  
4 Hornsby Ph.D.<sup>1,2</sup>, Robert C. Green M.D., M.P.H.<sup>3,7,8</sup>, Mark J. Daly Ph.D.<sup>4,5,9,10</sup>, Benjamin M. Neale Ph.D.<sup>1,4,5</sup>,  
5 Patrick T. Ellinor M.D., Ph.D.<sup>1,2,3</sup>, Jordan W. Smoller M.D., Sc.D.<sup>3,11,12</sup>, Matthew S. Lebo Ph.D.<sup>3,13,14</sup>,  
6 Elizabeth W. Karlson M.D., M.S.<sup>3,13,15</sup>, Alicia R. Martin Ph.D.<sup>1,4,5,\*</sup>, and Pradeep Natarajan M.D., M.M.Sc<sup>1,2,3,\*</sup>

- 7 1. Program in Medical and Population Genetics, Broad Institute of MIT and Harvard, Cambridge, MA, USA
- 8 2. Cardiovascular Research Center and Center for Genomic Medicine, Massachusetts General Hospital, Boston, MA, USA
- 9 3. Department of Medicine, Harvard Medical School, Boston, MA, USA
- 10 4. Analytic and Translational Genetics Unit, Massachusetts General Hospital, Boston, MA, USA
- 11 5. Stanley Center for Psychiatric Research, Broad Institute of MIT and Harvard, Cambridge, MA, USA
- 12 6. Integrative Research Center for Cerebrovascular and Cardiovascular Diseases, Yonsei University College of Medicine,  
13 Seoul, Republic of Korea
- 14 7. Department of Medicine (Genetics), MassGeneralBrigham, Boston, MA, USA
- 15 8. Broad Institute and Ariadne Labs, Boston, MA, USA
- 16 9. Institute for Molecular Medicine Finland (FIMM), Finland
- 17 10. University of Helsinki, Helsinki, Finland
- 18 11. Psychiatric and Neurodevelopmental Genetics Unit, Center for Genomic Medicine, Massachusetts General Hospital,  
19 Boston, MA, USA
- 20 12. Center for Precision Psychiatry, Department of Psychiatry, Massachusetts General Hospital, Boston, MA, USA
- 21 13. Mass General Brigham Personalized Medicine, Cambridge, MA, USA
- 22 14. Department of Pathology, Brigham and Women's Hospital, Boston, MA, USA
- 23 15. Division of Rheumatology, Inflammation and Immunity, Department of Medicine, Brigham and Women's Hospital.,  
24 Boston, MA, USA

25 \* A.R.M. and P.N. jointly supervised this work.

26 Please address correspondence to:

27 Alicia R. Martin, Ph.D.  
28 185 Cambridge Street  
29 Boston, MA 02114

30 [armartin@broadinstitute.org](mailto:armartin@broadinstitute.org)

31 Pradeep Natarajan, M.D., M.M.Sc  
32 185 Cambridge Street  
33 Boston, MA 02114

34 [pnatarajan@mgh.harvard.edu](mailto:pnatarajan@mgh.harvard.edu)

35 Figures 5

36 Supplemental Figures 10

37 Supplemental Tables 7

38 Supplemental Information (9 Figures)

39 **Abstract**

40 Mass General Brigham, an integrated healthcare system based in the Greater Boston area of  
41 Massachusetts, annually serves 1.5 million patients. We established the Mass General Brigham  
42 Biobank (MGBB), encompassing 142,238 participants, to unravel the intricate relationships among  
43 genomic profiles, environmental context, and disease manifestations within clinical practice. In this  
44 study, we highlight the impact of ancestral diversity in the MGBB by employing population genetics,  
45 geospatial assessment, and association analyses of rare and common genetic variants. The population  
46 structures captured by the genetics mirror the sequential immigration to the Greater Boston area  
47 throughout American history, highlighting communities tied to shared genetic and environmental factors.  
48 Our investigation underscores the potency of unbiased, large-scale analyses in a healthcare-affiliated  
49 biobank, elucidating the dynamic interplay across genetics, immigration, structural geospatial factors,  
50 and health outcomes in one of the earliest American sites of European colonization.

## 51 Introduction

52 Determinants of health include a complex interplay of sociodemographic, structural, genetic, and  
53 environmental factors that are also contextually dependent on time and geography. Disease risk  
54 prediction models and therapeutic paradigms are largely agnostic to many of these important features  
55 yet are intended for broad use. Such training datasets often lack the breadth and depth of information  
56 and the inherent diversity across features required for equitable applications. The United States  
57 populace is highly diverse, marked by complex migration patterns and dynamic social constructs and  
58 represents multilevel health contributors. For example, it is widely recognized that the prevalence of  
59 diseases is closely linked to individual or neighborhood social deprivation, which further varies across  
60 smaller domains and regions<sup>1,2</sup>. Furthermore, these determinants differentially contribute to health  
61 outcomes depending on local factors<sup>3,4</sup>.

62 Contemporary healthcare-associated biobanks represent a new opportunity to discover novel  
63 determinants of health and augment translation to clinical care. Such endeavors represent a recent  
64 collaborative synergy of large-scale population-based<sup>5-8</sup> and local healthcare- biobanks<sup>9-13</sup>.  
65 Understanding how DNA sequence variation tracks contemporary and historical population  
66 demographics can provide insights on differential disease burdens. For example, rs5742904  
67 (c.10580G>A, p.Arg3527Gln) in *APOB*, a founder pathogenic mutation for familial hypercholesterolemia  
68 has significantly higher allele frequency in Old Order Amish people. It substantially explains the  
69 increased risk for coronary artery atherosclerosis in this population<sup>14,15</sup>. Important insights related to  
70 genetic variations and clinical outcomes may often require profiling diverse populations. For example,  
71 the discovery of the association between disruptive variants in *PCSK9*<sup>16,17</sup> and lower low-density  
72 lipoprotein cholesterol in the African population, where these variants are prevalent, facilitated drug  
73 development. As another instance, *G6PD* deficiency<sup>18</sup> was recognized as a prevalent hemolytic  
74 disease in Sub-Saharan Africa. Studying diverse populations across a spectrum of diseases is crucial  
75 to assess the penetrance of disease-associated monogenic alleles<sup>19</sup> and polygenic models<sup>20</sup>.

76 Recent analyses of biobanks in the United States have uncovered the complex genetic structure of  
77 Hispanic and/or Latinx groups tracing their origins to the Americas<sup>9,12</sup>. In these efforts, it has been  
78 demonstrated that the fine genetic structure within biobanks can identify varying disease risks by  
79 capturing both ancestral and social structures, thereby contributing to the advancement of personalized  
80 medicine. Separately, recent advances in data size and methodology have enabled us to precisely  
81 characterize the complex population dynamics associated with multiple colonization and admixture  
82 events<sup>21-23</sup>. However, the interplay across these features, or their interaction with large-scale genetic  
83 association studies using whole-genome imputed or sequenced data, remains understudied.

84 The New England region represents among the earliest European colonization of the United States with  
85 sequential ongoing migration from diverse groups. In this study, we examined the genetic variation  
86 across New England coupled with sociodemographic, clinical, and environmental/geospatial factors in  
87 the Mass General Brigham Biobank (MGBB). By applying a network-based clustering algorithm with  
88 newly generated reference dataset, we established fine genetic clusters with subcontinental resolution  
89 within MGBB. These clusters exhibited distinct genetic properties, geographic distributions,  
90 socioeconomic statuses, and disease risks. In combination with rare and common variant genetic  
91 association analyses, we gained further insights into the different disease risks among these  
92 populations. Collectively, this study highlights the power of large-scale, unbiased analyses within a  
93 healthcare-based biobank to understand the complex interplay between genotypes and phenotypes,  
94 paving the way for increasingly personalized interventions.

## 95 **Results**

### 96 **Participant recruitment and Electronic Health Record (EHR) based phenotyping**

97 Since 2010, 142,238 individuals within the Mass General Brigham (MGB) network, the largest  
98 healthcare system in Massachusetts, have consented to participate in the MGBB as of May 11, 2023  
99 (Figure 1a, Supplemental Information Figure 1, Supplemental Table 1). Among participants, 99.5% (n =  
100 141,519) consented to re-contact. 56.8% of participants are female (n = 80,851, Figure 1b). Median  
101 [interquartile range; IQR] age at consent was 51 [35 – 63] years for female participants and 58 [43 – 68]  
102 years for males. Self-reported races were 84.4% White, 4.5% Black, and 3.0% Asian. Self-reported  
103 ethnicities were 86.6% non-Hispanic and 2.44% Hispanic (Supplemental Information Figure 2). The  
104 participants are primarily cared for at the two flagship MGB hospitals, both located in Boston, MA, and  
105 their associated clinics – Massachusetts General Hospital (MGH) and Brigham and Women’s Hospital  
106 (BWH, Figure 1c). The biobank data is interlinked with EHRs with phenotype data across the MGB  
107 network, as well as notable specialty centers in Boston, MA including the Mass Eye and Ear Institute  
108 (MEEI) and Dana-Farber Cancer Institute (DFCI). To generate systemically annotated  
109 prevalent/incident outcomes, we extracted International Classification of Diseases codes, Ninth (ICD9)  
110 and Tenth (ICD10) revisions, from the EHR and mapped them to PheCodes<sup>24</sup>. We identified 1,577 of  
111 1,860 possible PheCodes with at least one event (Figure 1d). Participants were followed for a median  
112 [IQR] of 4.3 [2.5 – 6.0] years after inclusion to MGBB with a median of 12 [5 – 25] incident events per  
113 person.

## 114 **Fine-scale clustering of genetic ancestry in MGBB**

115 Extending beyond traditional low-dimensional projections of continental ancestry from genome-wide  
116 data, we utilized high-dimensional principal components (PCs) to achieve greater granularity. Using  
117 genome-wide genotyping arrays, we genotyped 53,306 participants in the MGBB. By employing the top  
118 30 genetic PCs and a network-based clustering approach<sup>25</sup>, we identified 30 data-driven distinct  
119 ancestral clusters (Figure 2a, 2b, and 2c, Figure S1, Supplemental Table 2). The largest cluster (cluster  
120 0, ordered by sample size) includes 11,875 (22.3%) MGBB individuals. The smallest (cluster 29)  
121 includes only one MGBB participant as well as 27/27 reference Sardinian individuals from Human  
122 Genome Diversity Project (HGDP)<sup>26</sup>, suggesting the origin of this individual. As such, unsupervised  
123 clustering with diverse populations from the 1000 Genomes Project Phase 3 (1KG)<sup>27</sup> and HGDP  
124 reference panels<sup>28</sup> allowed us to infer the genetic similarity between these clusters and populations  
125 worldwide in an unbiased manner.

126 Cluster 0 was genetically similar to the Western European populations in the reference dataset (CEU  
127 [Utah residents with Western or Northern European ancestry] and GBR [British from England or  
128 Scotland] in 1KG, French and Orcadian in HGDP, Figure S2). In addition to the cluster 0, we identified  
129 eight distinct 1KG+HGDP-EUR-like clusters that cluster with Italian, Russian, Spanish, Adygei, Finnish,  
130 Basque, and Sardinian ancestries reflecting known patterns of migration to the Greater Boston Area.  
131 We also identified two distinct 1KG+HGDP-AMR-like clusters (cluster 5 enriched with PUR [Puerto  
132 Rican in Puerto Rica], cluster 8 with Colombian, Maya, PEL [Peruvian in Lima, Peru], Pima, CLM  
133 [Colombian in Medellín, Colombia], MXL [Mexican ancestry in Los Angeles, CA]), four African-like  
134 clusters (cluster 6 enriched with African Caribbean in Barbados and African Ancestry in Southwest USA,  
135 cluster 17 specific to Nigerian Africans [Esan in Nigeria, Yoruba in Ibadan, Nigeria], cluster 22 specific  
136 to Kenyan Africans [Bantu and Luhya in Webuye, Kenya], and cluster 18 with other Western Africans  
137 [Mandinka, Mende people in Sierra Leone, Gambian in Western Divisions in the Gambia]), and three  
138 East Asian-like clusters (cluster 19 specific to Japanese, cluster 20 specific to Uygur, and cluster 9 with  
139 other East Asians). We identified a single large cluster (cluster 10) enriched in South Asian reference  
140 populations, however, Hazara and Kalash populations formed distinct clusters.

141 Even with a diverse reference dataset, eight clusters comprising 9,874 (18.8%) MGBB individuals did  
142 not have enrichments of specific populations from the reference dataset. Among these unannotated  
143 clusters, seven clusters (4,7,11,13,14,15, and 21) exhibited genetic similarities to 1KG+HGDP-EUR  
144 populations. We calculated pairwise Fixation Index ( $F_{ST}$ ) values among clusters, and then constructed a  
145 phylogenetic tree of the clusters. The observed population differentiation between clusters further

146 corroborates the ancestral relationships but notable distinctions from continental populations and  
147 residents in New England (Figure S3a).

148 We also conducted ADMIXTURE<sup>29</sup> analyses to infer continuous population structures within these  
149 genetic clusters, many of which show similar patterns of structure across increasing numbers of  
150 ancestral components (Figure S3b). Using cross validation, ten was the best fit number of components  
151 (Supplemental Information Figure 3). We identified two 1KG+HGDP-EUR-like components  
152 (distinguished by components 4 and 9). The component 4 was most enriched in the Finnish-like cluster  
153 (cluster 24), and relatively enriched in northern European-like clusters (0, 1, and 3) more than the  
154 southern European-like clusters (2, 12, and 14). In contrast, the component 9 was enriched in the  
155 southern European-like cluster. We also observed a third component included in the European  
156 ancestries (component 3). This component 3 is prominent in the Kalash (Indo-European in northwest  
157 Pakistan) and other Pakistani reference populations. While this was enriched in southern European-like  
158 clusters, it was more enriched in un-annotated European-like genetic clusters 4, 7, 11, 13, and 21 than  
159 other annotated European genetic clusters, possibly consistent with Middle Eastern origins as this  
160 group is poorly represented in reference datasets.

161 Cluster 4 – the 5<sup>th</sup> largest cluster in this study (n = 3,514) – is one of such un-annotated European  
162 clusters. By comparison of allele frequencies between gnomAD<sup>30</sup> ancestries and our dataset, we found  
163 that cluster 4 has allele frequencies most similar to the Ashkenazi Jewish reference population  
164 (Supplemental Table 3). We also observed strong enrichment of skin neoplasms and inflammatory  
165 bowel diseases which were previously noted to be enriched in known Ashkenazi cohorts (Figure S4).  
166 We also observed significant enrichment of Ashkenazi Jewish founder mutations (e.g., *APC* c.3920T>A,  
167 p.Ile1307Lys, *BRCA1* c.68\_69del, p.Glu23fs, *BRCA1* c.5266dup, p.Gln1756fs, *BRCA2* c.5946del,  
168 p.Ser1982fs)<sup>31,32</sup> in this genetic cluster (Figure S5). We also observed enrichments of these founder  
169 mutations in un-annotated European clusters 11 and 14 suggesting close genetic relationships between  
170 these clusters to the Ashkenazi-like cluster 4. In addition to the European-like components, we also  
171 identified two different components (components 5 and 7) enriched in the East Asian clusters. One of  
172 these components (component 5) was also observed in the Finnish-like cluster which is consistent with  
173 previous observations<sup>33-36</sup>.

174 **Effective population size of ancestry clusters in the Greater Boston area**

175 To characterize the ancestral clusters observed in the MGBB, we estimated the historical transition of  
176 effective population size of each cluster using genome-wide genetic data (Figure S6). We conducted  
177 IBD-based estimation for effective population sizes ( $N_e$ ). Our results were consistent with some prior  
178 results conducted outside of the U.S. For example, we replicated previously described bottleneck event  
179 in Ashkenazi-like population (cluster 4). The lowest  $N_e$  was estimated to be 1,170 (95% CI = 1,100 –  
180 1,270) individuals at 28 generations ago<sup>37</sup>. We observed similar bottleneck events in clusters 11 and 14  
181 around the same generation (minimal  $N_e$  was 4,570 [4,210 – 5,030] in cluster 11 and 32,600 [30,700 –  
182 35,900] in cluster 14) consistent with the aforementioned sharing pattern of Ashkenazi founder  
183 mutations with cluster 4. The largest genetic cluster 0 indicates a population bottleneck occurring  
184 approximately 12 generations ago. This timeframe coincides with the initial colonization of the Boston  
185 area by British settlers. Intuitively, this event is not evident in the British population from the UK Biobank  
186 (UKBB) here or in previous studies<sup>38,39</sup> (Supplemental Information Figure 4), suggesting a unique  
187 founder event among British Americans due to colonization. We also observed a significant bottleneck  
188 event in the Admixed American populations, specifically in clusters 5 and 8, with a pronounced  
189 magnitude in the Puerto Rican-like cluster 5 (minimal  $N_e$  was 11,300 [11,100 – 11,600]). However, we  
190 did not observe such bottlenecks for other clusters potentially reflective of more continuous migration.



## 191 **Genetic clusters, geographic and socioeconomic factors, and disease risks**

192 We used geospatial scan statistics to understand the geographical structure of MGBB ancestry clusters.  
193 We observed 22 statistically significant regions of geographical enrichment among 13 genetic clusters  
194 in smaller than 4-km radius areas. We observed distributions of genetically inferred clusters  
195 recapitulating colonization histories into the Greater Boston Area (Figure 3a). One example of strong  
196 enrichment was observed in the southern area (Roslindale / Mattapan / Dorchester and separately  
197 Roxbury) by cluster 6 (ACB [African Caribbean in Barbados] and ASW [African ancestry in Southwest  
198 U.S.], expected number 105 and observed number 725,  $P < 1 \times 10^{-17}$ ). Another strong enrichment is  
199 observed northern of Boston (Charlestown / Chelsea) by cluster 5 (PUR [Puerto Rican in Puerto Rico],  
200 expected number 180 and observed number 624,  $P < 1 \times 10^{-17}$ ) in addition to Boston's South End  
201 extending to Roxbury / Hyde Park / Jamaica Plain. We also observed enrichment of Ashkenazi Jewish-  
202 like (cluster 4) and East Asian-like clusters (cluster 9) in areas seeded by early founding communities,  
203 such as Back Bay / Brookline / Cambridge (cluster 4) and Allston (cluster 9), respectively.

204 The western European-like clusters cluster 0 and cluster 1 were similar in conventional PC space  
205 (Figure S1) and ADMIXTURE analysis (Figure S3b)<sup>29</sup>, but well differentiated by network-based  
206 clustering (Figure 2a) as well as geospatially. The CEU/GBR-like cluster 0 was enriched in central  
207 areas of the Boston (Beacon Hill) and Cambridge (Harvard Square), representing the earliest sites of  
208 British colonization. Cluster 1 (Orcaadian-like, tagging northern populations of the British Isles including  
209 those hailing from Scotland and Ireland) is enriched in two different geographical locations, including  
210 Chelsea and South Boston, where secondary colonization occurred. These different geographical  
211 enrichments of cluster 0 versus cluster 1 reflect the distinct histories of these two similar, but distinct  
212 genetic European ancestries.

213 Socioeconomic status was correlated with both genetic ancestry as well as ancestral geographic  
214 distributions<sup>1</sup>. Using geocoded location information for each participant in our study, we calculated a  
215 Social Deprivation Index (SDI, ranged from 0 to 100, higher SDI indicating greater deprivation) for each  
216 participant and associated this with healthcare outcomes (Figure S8, Supplemental Table 4). The  
217 distributions of SDI widely differed across genetic ancestries (Figure S7a). Specifically, Cluster 6  
218 (enriched with African Caribbean in Barbados like population) exhibited the highest level of deprivation,  
219 with a median [IQR] SDI score of 83 [52 - 94]. Conversely, Cluster 4 (Ashkenazi Jewish-like) had the  
220 lowest deprivation, as indicated by a median [IQR] SDI score of 22 [8 - 45].

221 To systemically identify the associations between socioeconomic status and disease risk in MGBB, we  
222 associated SDI with phenome-wide outcomes captured by EHRs, adjusting for genetic ancestries. We  
223 found SDI was significantly associated with 400 out of 1,564 phenome-wide outcomes (Bonferroni  $P <$

224  $0.05/1,564 = 3.2 \times 10^{-5}$ , Figure 3b). Greater SDI was generally associated with increased disease  
225 prevalence and incidence (385 out of 400). The strongest SDI-associated PheCodes was with Tobacco  
226 use disorder (odds ratio; OR [95%CI]) per one standard deviation (SD) of SDI was 1.54 [1.48 – 1.60],  
227 followed by Mood disorders (OR = 1.26 [1.23 – 1.30]), and Depression (OR = 1.26 [1.23 – 1.30]). As  
228 represented by these examples, we observed greater risks for Mental disorders, followed by  
229 Uncharacterized Symptoms, Respiratory, and Circulatory systems per PheCodes categories,  
230 respectively (Figure 3c). However, prostate (OR 0.85 [0.80 – 0.90]) and breast (OR 0.89 [0.84 – 0.95]),  
231 cancer had significant/nominal negative associations with SDI (Figure 3b).

232 Using coronary artery disease (CAD) as an example of a common complex condition, we identified a  
233 significant association between SDI and CAD independent from clinical and genetic risk. The  
234 association remained significant even after adjustments for clinical risk score (Pooled Cohort Equation,  
235 PCE)<sup>40,41</sup>, and polygenic risk score<sup>42</sup> (PRS, OR<sub>1SD-SDI</sub> = 1.26 [1.17 – 1.35], OR<sub>1SD-PCE</sub> = 1.73 [1.65 –  
236 1.81], OR<sub>1SD-PRS</sub> 1.24 [1.13 – 1.36], in the multivariate model adjusted by the first ten genetic PCs,  
237 Figure S7).

## 238 Exome Sequencing in MGBB

239 Using high-coverage whole exome sequencing in the same group of individuals, we systemically  
240 identified rare coding variants in MGBB. There were significant differences in variant distributions  
241 across clusters. For instance, the Ashkenazi-like cluster 4 had fewer singleton variants (median [IQR] =  
242 138 [126 – 152] for cluster 4, and 489 [408 – 566] for others). In contrast, there were significantly more  
243 singletons in clusters 11 and 14, even though they are closely related to cluster 4 (320 [294 – 361] and  
244 400 [372 – 436], respectively, Supplemental Information Figure 5).

245 We identified median 15 [12 – 18] rare (Minor allele frequency, MAF < 0.01), high-confidence predicted  
246 loss-of-function (pLOF) variants per participant (Figure 4a). The largest number of pLOF variants were  
247 observed in African-like clusters (23.5 [20.25 – 26.0] in cluster 22, 21 [19 – 22] in cluster 26, 21 [17 –  
248 24] in cluster 17, 20 [17.0 – 23.0] in cluster 6). The Northern European-like clusters 1 and 0 had the  
249 fewest pLOFs (13 [11.0 – 16.0] in cluster 1 and 14 [12 – 17] in cluster 0 and 3). We also identified 1,425  
250 individuals (2.8% of total population) with at least one rare autosomal pLOF homozygous genotype  
251 across 761 genes.

252 We next explored established pathogenic variants (Figure 4b) in MGBB. 2.6% (1,318/50,625) of  
253 participants carry a potentially actionable pathogenic/likely pathogenic variant per American College of  
254 Medical Genetics and Genomics secondary findings guideline (ACMG SF, version 3.1)<sup>43,44</sup>. These  
255 included 6 homozygotes (*TP53*, *LDLR*, 4 *MUTYH*), and 7 potential compound heterozygotes (2 *BTD*, 3  
256 *MUTYH*, *ATP7B*, and *GAA*). Across genetic clusters, we observed substantial differences in the  
257 prevalence of these pathogenic variants (Figure 4c). The highest rate of actionable findings (> 4%) was  
258 observed in clusters 11 and 4 despite generally having the lower prevalence of very rare variants.  
259 Conversely, non-European clusters generally showed lower rates for annotated actionable variants.  
260 Considering higher number of alternate allele-counts in the non-European clusters, the genetic  
261 diagnostic rate was significantly lower in non-European populations (Figure S9). Namely, pLOF variants  
262 on ACMG SF v3.1 genes found in African and East Asian clusters have significantly lower likelihood of  
263 being annotated with a high-quality (more than equal two-stars) pathogenic/likely pathogenic annotation  
264 in comparison to the European participants (OR<sub>AFR</sub> 0.27 [0.18 - 0.41] and OR<sub>AMR</sub> and 0.48 [0.35 – 0.65],  
265 tested by Fisher's exact test), at least partly related to the underrepresentation of causative variants  
266 recurrently observed in non-European groups in the ClinVar<sup>45,46</sup> database.

267 To understand the clinical consequences of rare coding variants, we performed exome-wide and  
268 phenome-wide association study (PheWAS) across 1,454 PheCodes and 14,912 genes. We did not  
269 find substantial evidence of inflation in the test statistics (median Lambda GC<sub>1.0%</sub> 0.89 [0.86– 0.93] for  
270 AFR, and 0.90 [0.87 – 0.93] for AMR, 1.02 [0.99 – 1.05] for EUR, Supplemental Information Figure 6a).

271 We identified 51 significant associations ( $P < 1.8 \times 10^{-9}$ , 0.05/28,035,307 tested phenotype-transcript  
272 pairs, Supplemental Table 5) in the burden of rare pLOF and deleterious missense variants with 14  
273 genes, which included 8 ACMG SF v3.1 genes across 45 clinical outcomes (Figure 4d). In addition to  
274 the genes associated with known traits, we found significant associations between *PTEN* deleterious  
275 variants and increased risk for secondary hypothyroidism. This link was not described by previous rare  
276 variant targeted analysis<sup>47,48</sup> while *PTEN* deleterious variants have been known to be causal for  
277 hamartoma syndrome including thyroid cancers and abnormalities<sup>49,50</sup>. Nevertheless, we highlight  
278 numerous persistent risk signals from known Mendelian mechanisms of disease in MGBB.

## 279 **Genome-wide PheWAS in MGBB**

280 To further explore the relationship between genotype and phenotype in MGBB, we conducted a  
281 comprehensive genome-wide PheWAS using ICD code-based PheCodes. We associated over 20  
282 million common variants in African, European, and Admixed populations, which were imputed using the  
283 TOPMed imputation reference panel,<sup>51</sup> with 1,461 PheCodes. Similar to the rare variant burden test, we  
284 observed calibrated test statistics overall (median Lambda GC [IQR] were 0.98 [0.95 – 1.00] for AFR,  
285 0.97 [0.93 – 1.00] for AMR, 1.02 [0.99 – 1.03] for EUR, Supplemental Information Figure 6b). We  
286 identified 111 associations that reached genome-wide significance ( $P < 5 \times 10^{-8}/3,048 = 1.6 \times 10^{-11}$ ,  
287 Figure 5a, Supplemental Table 6), including 3 African and 1 AMR associations. We refined the  
288 prognosis of identified known low-frequency monogenic variants. For instance, we observed that the  
289 variant rs6025 (*F5*, c.1601G>A, p.Arg534Gln; Factor V Leiden) is strongly associated with Congenital  
290 deficiency of other clotting factors, including factor VII (OR [95%CI] = 11.56 [9.37 – 14.27],  $P = 3.6 \times$   
291  $10^{-68}$ ). Similarly, rs113993960 – a pathogenic variant in *CFTR* (c.1521\_1523del, p.Phe508del) – is  
292 associated with Cystic fibrosis (OR 14.67 [11.66 – 18.44],  $P = 2.4 \times 10^{-87}$ ).

293 Some of these variants exhibited a pronounced recessive effect on the phenotype. A prime example is  
294 the variant rs72660908, which is associated with Rhesus isoimmunization in pregnancy (Figure 5b).  
295 This medical condition exemplifies recessive inheritance resulting from the deletion of the *RHD* gene.  
296 As anticipated, the OR for heterozygotes was not significant (OR<sub>Hetero</sub> = 1.18 [0.53 – 2.7]) compared to  
297 the strong effect observed in homozygotes (OR<sub>Homo</sub> = 24.3 [14.6 – 43.1], Figure 5c). Recent large-scale  
298 sequencing analysis of structural variants<sup>52</sup> identified high linkage disequilibrium (LD) between  
299 rs72660908 and a large deletion affecting *RHD* ( $R^2 > 0.99$ ), which we support by strong expression  
300 quantitative trait loci (eQTL) effect of rs72660908 on *RHD*<sup>53</sup> (Figure 5d) and low coverage by exome  
301 sequencing in the MGBB (Supplemental Information Figure 7). We also observed a significant  
302 enrichment of cases among individuals who were homozygous for rs72660908, with 127 out of 156  
303 cases having the G/G genotype at this locus. As previously reported, individuals with the homozygous  
304 alternate allele for rs72660908 have a recessive inheritance pattern in European ancestry populations,  
305 but the frequency fluctuates among clusters (17% in cluster 0 and 9% in cluster 4, Figure 5e), and we  
306 observed very few copies in AFR/EAS populations.

307 Another noteworthy example is the association between rs73404549 and sickle cell anemia in the AFR  
308 population. This variant is in strong LD with rs334 (*HBB* c.20A>T, p.Glu7Val, HbS), a well-established  
309 pathogenic variant for sickle cell anemia. Despite high medical relevance, rs334 was not included in the  
310 TOPMed reference panel. We re-evaluated the impact of rs334 using exome sequencing data on sickle  
311 cell anemia and clinical red blood cell counts. rs334 showed stronger and more penetrant effect size for

312 sickle cell anemia than imputed rs73404549 ( $\beta_{rs334} = 4.14 \pm 0.25$ ,  $P_{rs334} = 5.9 \times 10^{-94}$ ,  $\beta_{rs73404549} = 3.05 \pm$   
313  $0.22$ ,  $P_{rs73404549} = 4.4 \times 10^{-46}$ ) with 14 homozygotes for rs334 and a penetrance rate of 79% (Figure  
314 S10a). Additionally, we noted another missense variant rs33930165 in *HBB* (*HBB* c.19G>A, p.Glu7Lys,  
315 HbC) – previously shown to confer malarial resistance without sickle cell anemia. We found 5  
316 participants with sickle cell anemia heterozygous for both HbS or HbC with significantly lower red blood  
317 cell counts compared to heterozygotes for either genotype (Figure S10b).

## 318 Discussion

319 In this study, we conducted multidimensional investigations into the structure of a modern healthcare-  
320 based biobank based at one of the earliest sites of durable European colonization. We show how  
321 expanded immigrant communities in the U.S. often exhibit genetic similarities to contemporary  
322 continental populations and reflect common bottlenecks. However, we also observe distinct  
323 bottlenecking effects of early colonization and patterns of admixture, and identify populations not well  
324 represented in reference datasets. Using geospatial indices, genetic ancestries, and phenome-wide  
325 outcome data, we described the architecture of diseases associated with regional socioeconomic  
326 factors such as area-level poverty, education level, single parent households, living in rented housing  
327 units or overcrowded housing units, living without a care or unemployment<sup>54</sup>. We further leverage rich  
328 genotyping and phenotyping to clarify several clinically relevant genetic associations complementing  
329 clinical and environmental features. This work advances an overall goal of comprehensively quantifying  
330 heterogeneous health determinants that uniquely vary across diverse communities in the U.S.

331 Leveraging population genetics, we delineated the complex ancestral components present within the  
332 Boston area. While our findings align well with prior studies on nationwide cohorts<sup>22,23,38,39</sup>, our research  
333 offers further granular insights into the individual-level ancestral histories of the participants, including  
334 lifestyle, genetic, and social risk factors associated with the diseases. We used genetic variation to  
335 explore the dynamic interplay of migration, expanded colonization sites, and geographic and  
336 community variation, aiming to study how social deprivation influences health, independent of the  
337 clinical and genetic risk factors. With distinctions from continental level ancestral histories, the complex  
338 history of communal- and individual-level factors can be uniquely mapped by healthcare-associated  
339 biobanks to uncover novel important drivers of health.

340 Area-defined SDI improved prediction performance when incorporated into existing clinical<sup>55,56</sup> and  
341 genetic risk stratification models<sup>57,58</sup> for common complex diseases. In this study, by integrating large  
342 scale EHR data and geographical information, we systemically assessed the impact of SDI on  
343 Phenome-wide scale across diverse ancestries and drew several clinical implications. First, our  
344 systemic assessment suggests that although SDI is a significant contributor to a wide range of diseases,  
345 the impacts of SDI are significantly varied across disease domains. For example, while mental and  
346 cardiopulmonary diseases are more prevalent among individuals experiencing social deprivation,  
347 cancers and congenital diseases are observed almost equally, irrespective of deprivation status.  
348 Furthermore, SDI is differentially yet ubiquitously associated with a wide array of health outcomes  
349 across various genetic ancestral groups. Finally, although the effect of SDI persisted across various

350 genetic clusters, the varying magnitude of association suggests an interaction between social  
351 deprivation and genetic factors as previously suggested<sup>59,60</sup>.

352 In addition to enabling detailed disease modeling, healthcare biobanks are unique and powerful  
353 resources for exploring rare genetic conditions or disease outcomes. First, we identified individuals  
354 carrying actionable variants, as defined by a curated database. However, these individuals are  
355 predominantly of specific European ancestries, suggesting a bias against non-Europeans in reference  
356 datasets, potentially resulting from disparities in clinical genetic testing<sup>19,61</sup>. Using an unbiased genomic  
357 scan, our study uncovered several significant associations, which may further refine prognosis within  
358 healthcare settings. Furthermore, we confirmed a penetrant association between an upstream variant  
359 of the *RHD* gene and Rhesus isoimmunization during pregnancy<sup>13,62</sup>, while also clarifying varied  
360 prevalence across diverse communities. Bringing these findings together, we highlight that healthcare  
361 biobanks, compared to general population-based biobanks, are enriched with uncommon outcomes,  
362 and associated genetic variations, thereby offering an ideal environment to study clinically pertinent  
363 scenarios.

364 Nevertheless, our study warrants several limitations. First, most of our enrollment occurred in tertiary  
365 hospitals. While this enabled us to include patients with rare and more severe conditions, the  
366 prevalence may not reflect the general population due to inclusion bias as previously described<sup>63</sup>.  
367 Second, MGBB participants are centralized in the greater Boston area of Massachusetts, which reflects  
368 the geographic location of the two main hospitals of the MGB health system. Communal and geospatial  
369 characteristics are likely to vary in other New England regions and more broadly across the U.S.  
370 Moreover, while our study provides detailed insights into European populations, the resolution for non-  
371 European populations is less robust due to limited sample sizes, reflecting the demography of the  
372 included region.

373 In conclusion, by utilizing a population genetics, we discerned specific ancestral clusters within the  
374 MGBB. These clusters reflect the colonization histories of the Greater Boston area and exhibit distinct  
375 genetic characteristics and disease susceptibilities. Individual-level clinical and lifestyle risk factors in  
376 combination with community context, structural factors, and genetic variation advance disease  
377 modeling toward precision medicine initiatives.



## 378 **Methods**

### 379 **Patient recruitment in MGBB and study protocols**

380 MGBB, previously known as Partners Biobank, is an integrated research initiative based in Boston,  
381 Massachusetts. It collects biological samples and health data from consenting individuals at  
382 Massachusetts General Hospital, Brigham and Women's Hospital, and local healthcare sites within the  
383 MGB network<sup>64</sup>. This repository of samples and data supports researchers aiming to decipher disease  
384 mechanisms, enhance personalized medicine, and innovate therapeutic solutions. Since July 1<sup>st</sup>, 2010,  
385 the MGBB has enrolled 142,238 participants, and extracted DNA from 88,665 participants' samples  
386 (62.3%). All participants provided written/electronic informed consent for broad biological and genetic  
387 research. The study protocol to analyze MGBB data was approved by the Mass General Brigham  
388 Institutional Review Board under protocol number 2018P001236. The study protocols to analyze UKBB  
389 data was approved under protocol number 2021P002228 and performed under UKBB application  
390 number 7089.

### 391 **Genotype quality control and imputation**

392 53,306 individuals were genotyped by Illumina Global Screening Array (Illumina, CA) in four batches  
393 (13,140 in the 1<sup>st</sup> batch, 11,649 in the 2<sup>nd</sup> batch, 5,976 in the 3<sup>rd</sup> batch, and 22,541 in the 4<sup>th</sup> batch).  
394 Genotypes were called using the Z-call software<sup>65</sup>. After genotype calling, we conducted quality control  
395 with the following steps. We re-aligned genotyping probes to the GRCh38 reference genome using the  
396 blast software<sup>66</sup> and extracted probes with perfect- unique match. We removed indels and multiallelic  
397 sites and removed variants with high missingness (> 2%) and low minor allele counts ( $\leq 2$ ). After  
398 genotype quality control, we estimated continental level ancestry using the 1KG dataset. We extracted  
399 common, high-quality SNPs (missingness < 1%, MAF > 1%) across MGBB and the 1KG dataset. After  
400 pruning SNPs, we computed SNP weights for genetic principal component using the 1KG dataset.  
401 Then, we projected MGBB participants into the same principal component space using 10 PCs. Using  
402 genetic PCs in 1KG dataset as a feature matrix, we trained a K-nearest neighbor model for population  
403 assignment (AFR, AMR, EAS, EUR, and SAS) to assign population labels to MGBB participants. With  
404 these inferred labels, we calculated Hardy Weinberg disequilibrium for each population and removed  
405 variants with  $P < 1 \times 10^{-6}$ . Finally, we compared the allele frequency in these populations with gnomAD  
406 allele frequency, then removed variants with deviation from ancestry specific gnomAD allele frequency  
407 (Chi-square value > 300). These quality control procedures were done by genotyping batch. We took  
408 the intersection of the variants in these four batches and generated dataset for imputation. Using the  
409 same set of variants, we imputed the genotypes by TOPMed imputation server<sup>67</sup>. We used TOPMed  
410 multi-ancestry imputation reference panel (TOPMed r2 panel) including 97,256 reference samples and

411 308,107,085 variants. Pre-phasing was carried out by Eagle software<sup>68</sup>, and imputation was conducted  
412 by Minimac4 software<sup>67,69</sup>. After the imputation, we merged all the four batches by vcftools<sup>70</sup> and  
413 converted to bgen file by PLINK2 software (9 Jan 2023)<sup>71</sup> for the downstream analysis.

#### 414 **Exome sequencing and quality control**

415 Exome sequences were performed by on Illumina NovaSeq instruments (Illumina, CA) with a custom  
416 exome capture kit (Human Core Exome, Twist Bioscience, CA), with a target of at least 20x coverage  
417 at > 85% of target sites. Alignment, processing, and joint calling of variants were performed using the  
418 Genome Analysis ToolKit (GATK, version v4.1)<sup>72</sup> following GATK best practices. The joint called  
419 dataset containing all 53,420 individuals processed by Hail framework<sup>73</sup> for further 1) genotype, 2)  
420 variant, and 3) sample quality controls. First, we split the multi-allelic site into biallelic by split\_multi\_hts  
421 function. Following this process, we removed low-quality genotypes and genotypes called by  
422 unbalanced allele balance. We consider genotypes that meet the following criteria as missing: For  
423 reference homozygotes: total depth (DP) < 10, or Genotype Quality (GQ) < 20. For heterozygotes: DP  
424 < 10, Genotype Likelihood for reference homozygote (PL) < 20, (Reference depth + A1 depth)/DP < 0.8,  
425 or (A1 depth)/DP < 0.2. For alternate homozygotes: DP < 10, PL < 20, or (A1 depth)/DP < 0.8.  
426 Following genotype quality control, we conducted variant-level quality control. First, we filtered variants  
427 in the low complexity region or outside of the target region  
428 (broad\_custom\_exome\_v1.Homo\_sapiens\_assembly38.bed) with 50bp flanks. We excluded i)  
429 monomorphic variants and, ii) variants with high missing rate (>10%). Using a quality-controlled variant  
430 set, we conducted sample-level quality control. We collected sample QC metric by Hail's sample\_qc  
431 function. We implemented five hard filters (percent chimeric reads, percent contamination, call rate,  
432 mean depth, and mean genotyping quality, Supplemental Information Figure 8) and four soft filters  
433 (number of singletons, Ts/Tv ratio, Het/Hom variant ratio, and Insertion/Deletion ratio, Supplemental  
434 Information Figure 9). For soft filters, we obtained residuals of metrics regressing by the first ten genetic  
435 PCs and excluded +/- 4SD outliers. Finally, using only unrelated quality-controlled samples, we  
436 computed Hardy-Weinberg P-values by continental ancestry estimated from genotyping data. Hardy-  
437 Weinberg P-values in chromosome X was computed only for Female participants. We excluded  
438 variants with ancestry-wise Hardy-Weinberg P-values <  $1 \times 10^{-6}$  or monomorphic variant. After quality  
439 control steps, 7,895,027 variants in 22 autosomes and chromosome X were found in 50,625 individuals  
440 remained.

#### 441 **Relatedness inference**

442 We utilized the pc\_relate<sup>74</sup> function from Hail to adjust for the presence of an admixed population within  
443 the MGBB, using 91,615 pruned, common (MAF > 1%) variants that are located outside the major

444 histocompatibility complex (chromosome 6 24,000,000 – 37,000,000 base pair). Among 53,306  
445 individuals, we identified 3,147 pairs with a kinship greater than 0.0884.

#### 446 **Derivation of genetic principal components**

447 To obtain insights utilizing reference populations, first we combined array genotypes from unrelated  
448 MGBB participants with recently generated whole genome sequence datasets from ancestrally diverse  
449 populations including 3,381 individuals from 1KG and HGDP<sup>28</sup>. We intersected 495,213 autosomal,  
450 non-palindromic variants outside the high LD region with minor allele counts  $\geq 10$ . After merging two  
451 datasets, we pruned variants by PLINK2 software<sup>71</sup> with `-indep-pairwise` option 1000 100 0.2 resulting  
452 in 257,754 variants. Using these genotypes, we derived the weight for each variant for PCs excluding  
453 related samples. Using derived weights, we calculated 30 PCs for all the individuals from MGBB, 1KG,  
454 and HGDP which were used in subsequent analysis.

#### 455 **Fixation index**

456 Pairwise Fixation indices ( $F_{ST}$ ) were computed among in MGBB-, 1KG- and HGDP- populations using  
457 PLINK2 software. The phylogenetic tree was constructed neighbor-joining method<sup>75</sup> implemented by  
458 ape R package<sup>76</sup>.

#### 459 **ADMIXTURE analysis**

460 Using PCs derived above, we conducted admixed component analysis using ADMIXTURE software  
461 (version 1.3.0)<sup>29</sup>. We optimized the number of admix component K from 1 to 20 and found that K = 10  
462 showed the least cross-validation error (Supplemental Information Figure 3).

#### 463 **Genetic ancestral clustering**

464 To derive fine-scale genetic clusters in the population, we conducted Graph-based clustering which is  
465 frequently used in single-cell RNA-seq clustering analysis implemented in Seurat software (version  
466 4.1.0)<sup>25</sup>. Though Seurat is primarily tailored for single-cell RNA seq data analyses, we leveraged its  
467 robust clustering capabilities for genetic ancestry clustering. Using the first 30 PCs derived above, we  
468 constructed a nearest-neighbor graph and classified individuals into distinct clusters using the Louvain  
469 algorithm, a default clustering approach in Seurat with resolution parameter of 0.2. As Seurat identified  
470 the clusters in an unsupervised mode, we used individuals from the 1KG or HGDP as a “spike in”  
471 positive controls (true labels).

#### 472 **Effective population size estimation**

473 To estimate the effective population size using haplotype sharing information, we used IBDNe in  
474 combination with the hap-ibd. First, we phased the genotypes of unrelated MGBB participants with

475 SHAPEIT software (version 4.2). Then, using hap-ibd software (version 1.0, 15Jun23.92f)<sup>77</sup>, we  
476 calculated IBD sharing, and this output was fed into IBDNe software (version 23Apr20)<sup>78</sup> to determine  
477 the effective population size for each ancestry. To compare the effective population size trajectories in  
478 British population in UK and MGBB, we computed effective population size in down-sampled, unrelated  
479 UKBB European-like population to the same sample size as MGBB British-like population (n=11,508),  
480 using microarray-based genotypes.

#### 481 **Variant annotation**

482 We annotated WES data using the VEP software (version 107)<sup>79</sup>, supplemented with the Loftee<sup>30</sup> and  
483 dbNFSP<sup>80</sup> plugins. The “—pick” option was enabled to prioritize the canonical transcript. Additionally,  
484 in-silico predictions from dbNFSP (version 4.2) were employed to prioritize missense variants.

#### 485 **Pathogenic variant annotation**

486 We downloaded ClinVar database<sup>45,46</sup> on Aug 16, 2022, and annotated all the variants identified by  
487 exome sequence using snpEff software (version 5.0e)<sup>81</sup>. We identified 536,729 variants registered in  
488 the ClinVar Database overall. To identify the carriers of pathogenic/likely pathogenic variants in the  
489 ACMG SF v3.1 actionable genes<sup>43,44</sup>, we only used variants with review status  
490 “reviewed\_by\_expert\_panel”, “criteria\_provided,\_multiple\_submitters,\_no\_conflicts”

#### 491 **Polygenic risk score**

492 Using the PRS-CS software<sup>82</sup>, we determined posterior weights for 1.2 million hapmap3 SNPs from a  
493 previous CAD GWAS<sup>42</sup>, which did not include the MGBB/UKBB population. Given our study’s  
494 predominant European population, we utilized the European reference panel provided by the PRS-CS  
495 authors. Our model training and derivation of posterior weights incorporated parameters phi ranging  
496 from  $1 \times 10^{-1}$ ,  $1 \times 10^{-2}$ ,  $1 \times 10^{-3}$ ,  $1 \times 10^{-4}$ , and  $1 \times 10^{-5}$ . With these weights, we determined the CAD-  
497 PRS for both UKBB and MGBB populations. From the UKBB results, we identified the optimal  
498 parameter phi as  $1 \times 1 \times 10^{-3}$  and applied this PRS in the MGBB analysis.

#### 499 **Disease Phenotyping**

500 We obtained patient data from the electronic health record system within the MGB network. We  
501 specifically extracted ICD9 and ICD10 codes assigned to each patient. To enhance the interpretability  
502 and powered analysis of the disease outcome, we employed the PheWAS R package (version 1.2)<sup>83</sup> to  
503 map these codes to corresponding PheCodes<sup>24</sup>. The PheWAS package utilizes a comprehensive  
504 catalog of PheCodes (<https://phewascatalog.org/phecodes>). This mapping process facilitated a more  
505 standardized and consistent representation of the patient’s conditions for subsequent analyses. To

506 determine the prevalence or incidence of diseases, we considered the date of blood draw for  
507 genotyping as the reference date. By aligning with the corresponding date of PheCodes occurrences,  
508 we identified the prevalent or incident outcomes related to the date of enrollment in MGBB.

### 509 **Clinical risk, genetic risk, and social risk for CAD**

510 For the CAD analysis, we calculated the 10-year Atherosclerotic Cardiovascular Disease (ASCVD) risk  
511 scores based on the PCE using the *PooledCohort* R package<sup>39,40,84</sup>. The PCE accounts for sex, race,  
512 age, total and HDL cholesterol, systolic blood pressure, antihypertensives prescription, current smoking,  
513 and prevalence of diabetes mellitus. For missing values, we performed multiple imputation by chained  
514 equations using the *mice* R package<sup>85</sup>, using enrollment age, sex, and race as predictors. Among  
515 participants without prior CAD, the first post-enrollment CAD incidence was ascertained based on  
516 relevant ICD-9 and ICD10 codes from in-hospital records. We assessed the individual association of  
517 10-year ASCVD risk, CAD-PRS, and SDI with incident CAD based on logistic regression.

### 518 **Exome-wide burden test**

519 We conducted a rare variant aggregation burden test implemented in Regenie software (version  
520 3.2.5)<sup>86</sup>. We generated masks comprised of predicted loss of function (high confidence by Loftee  
521 software<sup>30</sup>) and damaging missense variants predicted by > 90% of 29 in-silico prediction programs  
522 included in dbNFSP (version 4.2)<sup>80</sup> with MAF < 0.01.

### 523 **Genome-wide, phenome-wide association study**

524 We conducted single variant PheWAS using imputed genotypes and 1,461 PheCodes. We applied  
525 mixed model approach implemented in Regenie software (version 3.2.5)<sup>86</sup>. Null model was fit using  
526 pruned common variants derived from microarray-derived genotypes (MAF > 1%, pruned by PLINK2  
527 software<sup>71</sup> with option `-indep-pairwise 1000 100 0.9`). The analyses were conducted ancestry wise. For  
528 sex specific endpoint, only male or female were included in the analysis. The genome-wide significant  
529 threshold was set at  $P = 1.6 \times 10^{-11}$  dividing conventional genome-wide significant threshold  $5 \times 10^{-8}$  by  
530 3,048 tested phenotypes across three ancestries. To define the associated loci, we added the flanking  
531 region ( $\pm 500,000$  base-pairs) for all the variants with genome-wide significance ( $P < 1.6 \times 10^{-11}$ ) and  
532 merged all overlapping regions.

### 533 **PheWAS Inflation statistics**

534 We estimated Lambda GC (observed chi-squared value divided by expected value) i) at top 1.0  
535 percentile of the test statistics for rare variant burden PheWAS, and ii) using HapMap3 SNPs for

536 common variant PheWAS. For common variant PheWAS, LD score regression<sup>87</sup> was additionally  
537 performed to estimate intercept using ldsc R package (<https://github.com/mglev1n/ldsc>).

### 538 **Geocoding**

539 The participants' current address data was geocoded using the DeGAUSS framework<sup>88</sup>, a collection of  
540 geospatial tools designed for cleaning and formatting geographic data. This process converts the  
541 address information into standardized spatial data, specifically latitude and longitude coordinates. Our  
542 analysis focused on participants residing in Massachusetts. We excluded 1) Participants whose  
543 addresses were located outside of the state of Massachusetts, 2) Participants for whom the geocoding  
544 process failed. We successfully geocoded 48,369 individuals with genotype data.

### 545 **Area-based deprivation score index**

546 For individuals whose addresses were successfully geocoded, we proceeded with the following steps:  
547 A) We assigned each individual's address to a corresponding U.S. Census tract. Census tracts are  
548 small, relatively stable geographic areas that are defined by the United States Census Bureau. They  
549 are designed to be relatively homogeneous units with respect to population characteristics, economic  
550 status, and living conditions. B) We then merged this Census tract-level data with SDI (2018 SDI,  
551 downloaded from <https://www.graham-center.org/maps-data-tools/social-deprivation-index.html>)<sup>54</sup>. SDI  
552 is a composite measure of area level deprivation based on seven demographic characteristics collected  
553 in the American Community Survey (ACS) and used to quantify the socio-economic variation in  
554 health outcomes. The final SDI is a composite measure of seven demographic characteristics collected  
555 in the ACS: percent living in poverty, percent with less than 12 years of education, percent single-  
556 parent households, the percentage living in rented housing units, the percentage living in the  
557 overcrowded housing unit, percent of households without a car, and percentage non-employed adults  
558 under 65 years of age. This approach allows for a detailed, regional census tract-level analysis of the  
559 social conditions experienced by the study participants.

### 560 **Spatial enrichment analysis**

561 We utilized the Bernoulli model in SaTScan<sup>89</sup>. Under this model, individuals belonging to a specific  
562 genetic cluster were treated as "cases," while all other individuals were treated as "controls." This  
563 model compares the rates of cases in different areas to determine if the rate of cases inside the  
564 potential cluster area is significantly different from outside. To avoid detecting overly large and  
565 potentially less meaningful clusters, we limited our scan by setting the maximal diameter of the spatial  
566 cluster window. Specifically, we restricted this to a maximum radius of 4 kilometers.

### 567 **Data availability**

568 Genotyping and exome sequencing data for 13,500 participants from the MGBB are available in dbGAP  
569 ([https://www.ncbi.nlm.nih.gov/projects/gap/cgi-bin/study.cgi?study\\_id=phs002018.v1.p1](https://www.ncbi.nlm.nih.gov/projects/gap/cgi-bin/study.cgi?study_id=phs002018.v1.p1)).  
570 Additional MGBB data were accessed under institutional review board protocol for this current study  
571 and are not publicly available due to restrictions on the data. The summary statistics for phenome-wide  
572 common/rare variant association analysis and the allele frequencies of genetic clusters will be publically  
573 available upon the publication.

574 **Acknowledgements**

575 **Funding sources**

576 S.K. is supported by Japan Society for the Promotion of Science (202160643), Uehara Memorial  
577 Foundation, and National Institute of Health (NIH), National Heart Lung and Blood Institute (NHLBI,  
578 K99HL169733). K.P is supported by the MGH Executive Committee for Research Fund for Medical  
579 Discovery. S.J.C. is supported by a grant of the Korea Health Technology R&D Project through the  
580 Korea Health Industry Development Institute (KHIDI), funded by the Ministry of Health and Welfare,  
581 Republic of Korea (HI19C1330). S.M.U. is supported by NIH National Human Genetics Research  
582 Institute (NHGRI, T32HG010464). R.C.G. is supported by NIH (HG009922, OD026553, HL143295,  
583 TR003201). B.M.N. is supported by R37MH107649. P.T.E. is supported by grants from the NIH  
584 (1R01HL092577, 1R01HL157635, 5R01HL139731), from the American Heart Association  
585 (18SFRN34230127, 961045), and from the European Union (MAESTRIA 965286). J.W.S. is supported  
586 by OT2OD026553, U01HG008685, MH118233. M.L. is supported by grants from the NIH  
587 (OT2OD002750, R01HL143295, U01HG008685, U01TR003201, and U24HG006834). E.K. is  
588 supported by grants from the NIH (OT2OD026553, U01HG008685, P30 AR070253, OT2HL161841).  
589 A.R.M. and Y.W. are supported by NIH, NHGRI (K99/R00MH117229 to A.R.M.) and by European  
590 Union's Horizon 2020 research and innovation program under grant agreement 101016775. A.R.M. is  
591 also supported by U01HG011719. P.N. is supported by grants from the NHLBI (R01HL127564), and  
592 NHGRI (U01HG011719).

593 **Declaration of interests**

594 K.P. reports research grants, paid to her institution, from Allelica, Apple, Amgen, AstraZeneca, Boston  
595 Scientific, Genentech / Roche, and Ionis. R.C.G. has received compensation for advising the following  
596 companies: Allelica, Atria, Fabric, Genome Web, Genomic Life and Juniper Genomics; and is co-  
597 founder of Genome Medical and Nurture Genomics. M.J.D is a founder of Maze Therapeutics and is a  
598 member of the scientific advisory board for Neumora Therapeutics, Inc. (formerly known as RBNC  
599 Therapeutics). B.M.N. is a member of the scientific advisory board at Deep Genomics and Neumora  
600 Therapeutics, Inc. J.W.S. is a member of the Scientific Advisory Board of Sensorium Therapeutics (with  
601 equity), and has received grant support from Biogen, Inc. P.T.E. receives sponsored research support  
602 from Bayer AG, IBM Research, Bristol Myers Squibb, Pfizer and Novo Nordisk; he has also served on  
603 advisory boards or consulted for MyoKardia and Bayer AG. J.W.S. is PI of a collaborative study of the  
604 genetics of depression and bipolar disorder sponsored by 23andMe for which 23andMe provides  
605 analysis time as in-kind support but no payments. P.N. reports research grants from Allelica, Apple,  
606 Amgen, Boston Scientific, Genentech / Roche, and Novartis, personal fees from Allelica, Apple,



607 AstraZeneca, Blackstone Life Sciences, Eli Lilly & Co, Foresite Labs, Genentech / Roche, GV,  
608 HeartFlow, Magnet Biomedicine, and Novartis, scientific advisory board membership of Esperion  
609 Therapeutics, Preciseli, and TenSixteen Bio, scientific co-founder of TenSixteen Bio, equity in MyOme,  
610 Preciseli, and TenSixteen Bio, and spousal employment at Vertex Pharmaceuticals, all unrelated to the  
611 present work.

## 612 **Author contributions**

613 R.C.G., M.J.D., B.M.N., P.T.E., E.W.K., A.R.M., and P.N. conceptualized this project. S.K., K.P., S.J.C.,  
614 and E.W.K. curated phenotype data. S.K., and M.S.L. curated genotype data. S.K., M.U., and S.M.U.  
615 analyzed data. S.K., Y.W., P.T.E., E.W.K., A.R.M., and P.N. interpreted data. S.K., A.R.M., and P.N.  
616 prepared the initial draft. Y.W., K.P., M.U., S.J.C., W.E.H., R.C.G., M.J.D., B.M.N., P.T.E., J.W.S.,  
617 E.W.K., A.R.M., and P.N. provided critical review and edits for the manuscript. S.H., W.E.H., R.C.G.,  
618 M.J.D., B.M.N., P.T.E., E.W.K., A.R.M., and P.N. supervised the project. S.H., W.E.H., P.T.E., J.W.S.,  
619 M.S.L., and E.W.K. managed the project administration. P.T.E., J.W.S., M.S.L., E.W.K., and P.N.  
620 obtained funding for the project.

## 621 **Figure Legends**

### 622 **Figure 1 | The cohort characteristics of MGBB**

623 **a**, The columns represent the cumulative number of individuals who have consented to the MGBB.  
624 Colors indicate the vital status of participants as of May 2023. **b**, Gender/Age at Consent Distribution:  
625 The columns represent the distribution of the participants based on gender and age at the time of  
626 consent. The individuals older than 100 years at the time of consent are not included in the displayed  
627 numbers. **c**, Encounter patterns in the MGB Network. The number of encounters that participants have  
628 had within the MGB network. Please note that these encounters include sites where recruitment did not  
629 take place. **d**, Distribution of PheCodes based outcomes. The columns indicate the number of  
630 outcomes in PheCode-category. Colors distinguish between incident and prevalent cases. MGH,  
631 Massachusetts General Hospital; BWH, Brigham's and Women's Hospital, MEEI Mass Eye and Ear  
632 Institute; FH Faulkner Hospital; NWH, Newton-Wellesley Hospital; DFCl, Dana-Farber Cancer Institute.

### 633 **Figure 2 | Fine-scale genetic clusters within MGBB**

634 **a**, and **b**, UMAP representation of genetic clusters in MGBB. Each dot represents a participant, with  
635 colors indicating distinct genetic clusters identified through graph-based clustering from genetic  
636 principal components (Methods). The numbers indicate cluster identification. The color legend and  
637 detailed cluster information will be found in Supplemental Table 2 and Figure S2. **c**, Population  
638 differentiation in MGBB revealed by ADMIXTURE analysis. The heatmap displays the proportions of  
639 ADMIXTURE components ( $K = 10$ ) within each genetic cluster. The columns at the top of the heatmap  
640 represent the number of MGBB participants in each cluster. UMAP, Uniform Manifold Approximation  
641 and Projection; MGBB, Mass General Brigham Biobank

### 642 **Figure 3 | Geospatial distribution, socioeconomic status, and disease risks in MGBB**

643 **a**, Geographical enrichment of genetic ancestries in the greater Boston area. The circle indicates area  
644 of significant enrichment of corresponding genetic ancestries. **b**, We tested the association between the  
645 socioeconomic deprivation index (SDI) and 1,564 PheCodes based outcomes (Prevalence + Incidence)  
646 in 47,070 MGBB participants. The model was adjusted for age, sex, and the first ten genetic principal  
647 components. An association was considered statistically significant if  $P$ -value was less  $3.2 \times 10^{-5}$   
648 ( $0.05/1,564$ ). The color of bars indicated the direction of the effect of SDI (higher SDI suggests higher  
649 deprivation). **c**, The disease frequency (prevalence + incidence) by deprivation status and genetic  
650 ancestry. The color of bars indicated deprivation status (higher or lower than the median SDI).  
651 Complication of Birth, Other and unspecified complications of birth; puerperium affecting management  
652 of mother (PheCode 654).

### 653 **Figure 4 | Rare variant identification in the MGBB**

654 **a**, Distribution of the number of protein-truncating variants across genetic ancestries. Each dot  
655 represents a participant. The horizontal axis represents the genetic ancestries in the MGBB, while the  
656 vertical axis represents the number of protein-truncating alleles in each participant. **b**, Carrier counts of  
657 pathogenic/likely pathogenic variants in ACMG actionable genes. The colors of the bars indicate the  
658 mode of inheritance of the genes. **c**, Carrier frequency of individuals with pathogenic variants in ACMG  
659 actionable genes, categorized by ancestry. The colors of the bars correspond to the continental  
660 ancestries. The dotted line represents the average frequency in the MGBB. **d**, Summary of phenome-  
661 wide gene burden testing in the MGBB. We conducted exome-wide phenome wide association analysis

662 across 1,454 PheCodes based outcomes in 14,912 genes. The columns indicate the number of  
663 significant associations ( $P < 1.8 \times 10^{-9} = 5 \times 10^{-2}/28,035,307$  phenotype-transcript pairs) for designated  
664 genes. The color of each column corresponds to the associated PheCode-category. MGBB, Mass  
665 General Brigham Biobank; ACMG, American College of Medical Genetics and Genomics; pLOF,  
666 predicted loss of function; AFR, African; AMR, Admixed-American; EAS, East Asian; EUR, European;  
667 SAS, South Asian.

#### 668 **Figure 5 | Common variant association study in the MGBB**

669 **a**, Number of associations in the common variant phenome-wide association analysis in MGBB.  
670 We conducted associations between common genetic variants (Minor allele counts  $\geq 40$ ) and  
671 1,461 PheCodes (Case counts  $\geq 60$ ), categorized by continental ancestries (AFR,  $n = 2,846$ ;  
672 AMR,  $n = 3,756$ ; EUR,  $n = 44,163$ ). The columns represent the number of significant  
673 associations ( $P < 1.6 \times 10^{-11}$ ) on each chromosome. The color indicates the ancestry in which  
674 the association was observed. We annotated chromosomes with more than 10 associations,  
675 indicating the representative locus in the chromosome. **b**, Manhattan plot of GWAS for Rhesus  
676 isoimmunization during pregnancy in women ( $n = 23,959$ ). The horizontal axis displays the  
677 genomic coordinates from chromosome 1 to chromosome X. The vertical axis represents the  
678 strength of association in negative  $\log_{10} P$ -value. The significantly associated variants in the  
679 *RHD* locus is highlighted. **c**, Odds ratio for Rhesus isoimmunization during pregnancy by  
680 rs72660908 genotypes. The dots and error bars represent the estimated odds ratios and 95%  
681 confidence intervals compared to the reference homozygotes ([C/C]). **d**, *RHD* read counts from  
682 Whole Blood RNA sequence data obtained from the GTEx dataset. The horizontal axis  
683 displays the number of reads aligned to the *RHD* gene, categorized by rs72660908 genotypes.  
684 **e**, Frequencies of rs72660908 homozygotes across genetic clusters in MGBB. The horizontal  
685 axis corresponds to the genetic ancestries in MGBB, while the vertical axis represents the  
686 ancestral frequency of rs72660908 homozygotes ([G/G]). The colors of the columns  
687 correspond to continental ancestries. MGBB, Mass General Brigham Biobank; ACMG,  
688 American College of Medical Genetics and Genomics; pLOF, predicted loss of function; AFR,  
689 African; AMR, Admixed-American; EAS, East Asian; EUR, European; SAS, South Asian;  
690 GWAS, Genome-Wide Association Study; GTEx, Genotype-Tissue Expression.

## 691 **Supplemental Figure Legends**

### 692 **Figure S1 | Projection of the fine genetic clusters in the continental ancestry space**

693 **a**, The distribution of the continental ancestries in the UMAP space. Each point on the plot represents  
694 an individual participant of MGBB. To infer the continental ancestry of each participant, we utilized the  
695 K-nearest neighbor algorithm trained on the 1000 Genomes Project dataset. The colors assigned to the  
696 points represent the inferred continental ancestries. The horizontal axis corresponds to the first axis of  
697 the UMAP projection, and the vertical axis represents the second axis. This two-dimensional  
698 representation allows us to visualize the clustering and distribution patterns of different continental  
699 ancestries within the MGBB population. **b**, The distribution of the fine-scale genetic clusters in the  
700 MGBB on conventional PC space. Each point on the plot represents an individual in MGBB. The colors  
701 assigned to the points represent genetic clusters inferred by the network-based clustering method  
702 (Methods). The horizontal axis corresponds to the first genetic PC, and the vertical axis represents the  
703 second genetic PC. UMAP, Uniform Manifold Approximation and Projection; MGBB, Mass General  
704 Brigham Biobank; PC, principal component.

### 705 **Figure S2 | Enrichment of the reference groups in the genetic clusters inferred in MGBB**

706 The horizontal axis shows reference populations from 1000 Genomes Project and Human Genome  
707 Diversity Project. The vertical axis shows genetic clusters inferred from MGBB. In the left panel, the  
708 heights of bars show the number of MGBB participants included in the genetic clusters. In the right  
709 panel, the size and transparency of rectangle shows intersection size between reference population  
710 and genetic clusters. The number of individuals in the clusters and the color legend are found in  
711 Supplemental Table 2. Abbreviations for reference populations will be found in Supplemental Table 7.  
712 MGBB, Mass General Brigham Biobank.

### 713 **Figure S3 | ADMIXTURE analysis for reference population (1KG + HGDP) and genetic clusters**

714 **a**, Phylogenetic tree generated using *Fst* Values. The phylogenetic tree was constructed using the  
715 Neighbor-Joining method with pairwise *Fst* values serving as a measure of genetic distance between  
716 populations. A higher *Fst* value indicates a greater genetic differentiation between populations. The  
717 numeric numbers indicate genetic cluster in MGBB. Ancestry names indicated reference populations in  
718 1KG or HGDP. The number indicate genetic clusters in MGBB. **b**, In each panel, a stacked column of  
719 color segments represents an individual participant. The color of each segment corresponds to one of  
720 the  $K = 10$  ancestral components, as determined by ADMIXTURE software. The length of each colored  
721 segment within a participant's column indicates the estimated proportion of their genome attributed to  
722 that specific ancestral population. The choice of  $K = 10$  was informed by cross-validation results, with  
723 the aim of minimizing prediction error (Supplemental Information Figure 3). The abbreviations and  
724 detailed descriptions for the ancestral populations corresponding to each color are provided in  
725 Supplemental Table 7. 1KG, 1000 Genomes Project; HGDP, Human Genome Diversity Project; MGBB,  
726 Mass General Brigham Biobank.

### 727 **Figure S4 | Phenome wide association analysis for cluster 4**

728 Each dot represents the association results based on PheCodes. We examined the relationship  
729 between membership in genetic cluster 4 of the MGBB biobank and PheCodes outcomes. This  
730 association was assessed using a logistic regression model, adjusted for age and sex. MGBB, Mass  
731 General Brigham Biobank.

732 **Figure S5 | Shared founder mutations across genetic clusters 4, 11, and 14**

733 The left panels are showing the distribution of genetic cluster 4, 11, and 14 in the UMAP space. The  
734 right panel shows the distribution of Ashkenazi founder mutations described in the previous literatures.  
735 The horizontal axes show the genetic clusters identified in MGBB, and the vertical axes show the allele  
736 frequencies determined by whole exome sequencing of MGBB by the genetic clusters. UMAP, Uniform  
737 Manifold Approximation and Projection; MGBB, Mass General Brigham Biobank.

738 **Figure S6 | Effective population sizes in the genetic clusters in MGBB**

739 The horizontal axes show generations ago. The vertical axes show the estimated population size.  
740 Numbers on the top of panels show the cluster identification. The black lines show the estimates and  
741 gray lines show 95% confidence interval.

742 **Figure S7 | Geographical, socioeconomic, distributions of genetic clusters**

743 Distributions of socioeconomic (a), clinical (b), and genetic risks (c). Each dot indicates MGBB  
744 participants. The horizontal axes show genetic cluster. SDI, social deprivation index; PCE, pooled  
745 cohort equation, CAD PRS, polygenic risk score for coronary artery disease.

746 **Figure S8 | Social deprivation in Massachusetts and Greater Boston Area**

747 The color of each grid represents the median Social Deprivation Index (SDI) of the participants from  
748 MGBB. A darker shade denotes a higher level of socioeconomic deprivation. Grids with fewer than five  
749 participants have been excluded.

750 **Figure S9 | Different annotation rate for the functional variants in the pathogenic genes**

751 a, The bar heights depict the proportion of pLOF variants in ACMG genes within specific genetic  
752 clusters identified in MGBB with pathogenic/likely pathogenic annotations as determined by multiple  
753 expert reviews in ClinVar. b, The odds ratio indicates the likelihood of pLOF variants in ACMG genes  
754 having pathogenic/likely pathogenic annotations based on multiple expert reviews. The results are  
755 presented in the continental ancestries and in reference to the European population. Error bars indicate  
756 95% confidence intervals. OR, Odds Ratio; AFR, African; AMR, Admixed American; EAS, East Asian;  
757 EUR, European; SAS, South Asian. ACMG, American College of Medical Genetics and Genomics;  
758 MGBB, Mass General Brigham Biobank; pLOF predicted loss of function.

759 **Figure S10 | Penetrant association of rs334 for sickle cell anemia**

760 a, The prevalence of Sickle cell anemia by rs334 genotypes. b, The RBC measurements in the MGB  
761 participants by combined genotype of rs33930165 and rs334. The box plot depicts the first and third  
762 quartiles, with the line inside the box indicating the median value. RBC, Red Blood Cell count.

## 763 References

- 764 1. Townsend, P., Phillimore, P., and Beattie, A. (1988). *Health and Deprivation: Inequality and the*  
765 *North* (Routledge).
- 766 2. Li, X., Memarian, E., Sundquist, J., Zöller, B., and Sundquist, K. (2014). Neighbourhood Deprivation,  
767 Individual-Level Familial and Socio-Demographic Factors and Diagnosed Childhood Obesity: A  
768 Nationwide Multilevel Study from Sweden. *Obesity Facts* 7, 253-263. [10.1159/000365955](https://doi.org/10.1159/000365955).
- 769 3. Bann, D., Johnson, W., Li, L., Kuh, D., and Hardy, R. (2018). Socioeconomic inequalities in  
770 childhood and adolescent body-mass index, weight, and height from 1953 to 2015: an analysis of  
771 four longitudinal, observational, British birth cohort studies. *Lancet Public Health* 3, e194-e203.  
772 [10.1016/S2468-2667\(18\)30045-8](https://doi.org/10.1016/S2468-2667(18)30045-8).
- 773 4. Fan, J.X., Wen, M., and Li, K. (2020). Associations between obesity and neighborhood  
774 socioeconomic status: Variations by gender and family income status. *SSM Popul Health* 10,  
775 100529. [10.1016/j.ssmph.2019.100529](https://doi.org/10.1016/j.ssmph.2019.100529).
- 776 5. Akiyama, M., Okada, Y., Kanai, M., Takahashi, A., Momozawa, Y., Ikeda, M., Iwata, N., Ikegawa, S.,  
777 Hirata, M., Matsuda, K., et al. (2017). Genome-wide association study identifies 112 new loci for  
778 body mass index in the Japanese population. *Nat Genet* 49, 1458-1467. [10.1038/ng.3951](https://doi.org/10.1038/ng.3951).
- 779 6. Bycroft, C., Freeman, C., Petkova, D., Band, G., Elliott, L.T., Sharp, K., Motyer, A., Vukcevic, D.,  
780 Delaneau, O., O'Connell, J., et al. (2018). The UK Biobank resource with deep phenotyping and  
781 genomic data. *Nature* 562, 203-209. [10.1038/s41586-018-0579-z](https://doi.org/10.1038/s41586-018-0579-z).
- 782 7. Zhou, W., Kanai, M., Wu, K.H., Rasheed, H., Tsuo, K., Hirbo, J.B., Wang, Y., Bhattacharya, A., Zhao,  
783 H., Namba, S., et al. (2022). Global Biobank Meta-analysis Initiative: Powering genetic discovery  
784 across human disease. *Cell Genom* 2, 100192. [10.1016/j.xgen.2022.100192](https://doi.org/10.1016/j.xgen.2022.100192).
- 785 8. Kurki, M.I., Karjalainen, J., Palta, P., Sipila, T.P., Kristiansson, K., Donner, K.M., Reeve, M.P.,  
786 Laivuori, H., Aavikko, M., Kaunisto, M.A., et al. (2023). FinnGen provides genetic insights from a  
787 well-phenotyped isolated population. *Nature* 613, 508-518. [10.1038/s41586-022-05473-8](https://doi.org/10.1038/s41586-022-05473-8).
- 788 9. Belbin, G.M., Cullina, S., Wenric, S., Soper, E.R., Glicksberg, B.S., Torre, D., Moscati, A., Wojcik,  
789 G.L., Shemirani, R., Beckmann, N.D., et al. (2021). Toward a fine-scale population health monitoring  
790 system. *Cell* 184, 2068-2083 e2011. [10.1016/j.cell.2021.03.034](https://doi.org/10.1016/j.cell.2021.03.034).
- 791 10. Verma, A., Damrauer, S.M., Naseer, N., Weaver, J., Kripke, C.M., Guare, L., Sirugo, G., Kember,  
792 R.L., Drivas, T.G., Dudek, S.M., et al. (2022). The Penn Medicine BioBank: Towards a Genomics-  
793 Enabled Learning Healthcare System to Accelerate Precision Medicine in a Diverse Population. *J*  
794 *Pers Med* 12. [10.3390/jpm12121974](https://doi.org/10.3390/jpm12121974).
- 795 11. Brumpton, B.M., Graham, S., Surakka, I., Skogholt, A.H., Loset, M., Fritsche, L.G., Wolford, B., Zhou,  
796 W., Nielsen, J.B., Holmen, O.L., et al. (2022). The HUNT study: A population-based cohort for  
797 genetic research. *Cell Genom* 2, 100193. [10.1016/j.xgen.2022.100193](https://doi.org/10.1016/j.xgen.2022.100193).
- 798 12. Johnson, R., Ding, Y., Bhattacharya, A., Knyazev, S., Chiu, A., Lajonchere, C., Geschwind, D.H.,  
799 and Pasaniuc, B. (2023). The UCLA ATLAS Community Health Initiative: Promoting precision health  
800 research in a diverse biobank. *Cell Genom* 3, 100243. [10.1016/j.xgen.2022.100243](https://doi.org/10.1016/j.xgen.2022.100243).
- 801 13. Zawistowski, M., Fritsche, L.G., Pandit, A., Vanderwerff, B., Patil, S., Schmidt, E.M., VandeHaar, P.,  
802 Willer, C.J., Brummett, C.M., Khetarpal, S., et al. (2023). The Michigan Genomics Initiative: A  
803 biobank linking genotypes and electronic clinical records in Michigan Medicine patients. *Cell Genom*  
804 3, 100257. [10.1016/j.xgen.2023.100257](https://doi.org/10.1016/j.xgen.2023.100257).
- 805 14. Soria, L.F., Ludwig, E.H., Clarke, H.R., Vega, G.L., Grundy, S.M., and McCarthy, B.J. (1989).  
806 Association between a specific apolipoprotein B mutation and familial defective apolipoprotein B-100.  
807 *Proceedings of the National Academy of Sciences* 86, 587-591. [10.1073/pnas.86.2.587](https://doi.org/10.1073/pnas.86.2.587).

- 808 15. Shen, H., Damcott, C.M., Rampersaud, E., Pollin, T.I., Horenstein, R.B., McArdle, P.F., Peyser, P.A.,  
809 Bielak, L.F., Post, W.S., Chang, Y.-P.C., et al. (2010). Familial Defective Apolipoprotein B-100 and  
810 Increased Low-Density Lipoprotein Cholesterol and Coronary Artery Calcification in the Old Order  
811 Amish. *Archives of Internal Medicine* 170. 10.1001/archinternmed.2010.384.
- 812 16. Cohen, J.C., Boerwinkle, E., Mosley, T.H., and Hobbs, H.H. (2006). Sequence Variations in *PCSK9*,  
813 Low LDL, and Protection against Coronary Heart Disease. *New England Journal of Medicine* 354,  
814 1264-1272. 10.1056/nejmoa054013.
- 815 17. Cohen, J., Pertsemlidis, A., Kotowski, I.K., Graham, R., Garcia, C.K., and Hobbs, H.H. (2005). Low  
816 LDL cholesterol in individuals of African descent resulting from frequent nonsense mutations in  
817 *PCSK9*. *Nature Genetics* 37, 161-165. 10.1038/ng1509.
- 818 18. Luzzatto, L., Ally, M., and Notaro, R. (2020). Glucose-6-phosphate dehydrogenase deficiency. *Blood*  
819 136, 1225-1240. 10.1182/blood.2019000944.
- 820 19. Manrai, A.K., Funke, B.H., Rehm, H.L., Olesen, M.S., Maron, B.A., Szolovits, P., Margulies, D.M.,  
821 Loscalzo, J., and Kohane, I.S. (2016). Genetic Misdiagnoses and the Potential for Health Disparities.  
822 *New England Journal of Medicine* 375, 655-665. 10.1056/nejmsa1507092.
- 823 20. Aragam, K.G., Dobbyn, A., Judy, R., Chaffin, M., Chaudhary, K., Hindy, G., Cagan, A., Finneran, P.,  
824 Weng, L.C., Loos, R.J.F., et al. (2020). Limitations of Contemporary Guidelines for Managing  
825 Patients at High Genetic Risk of Coronary Artery Disease. *J Am Coll Cardiol* 75, 2769-2780.  
826 10.1016/j.jacc.2020.04.027.
- 827 21. Baharian, S., Barakatt, M., Gignoux, C.R., Shringarpure, S., Errington, J., Blot, W.J., Bustamante,  
828 C.D., Kenny, E.E., Williams, S.M., Aldrich, M.C., and Gravel, S. (2016). The Great Migration and  
829 African-American Genomic Diversity. *PLOS Genetics* 12, e1006059. 10.1371/journal.pgen.1006059.
- 830 22. Han, E., Carbonetto, P., Curtis, R.E., Wang, Y., Granka, J.M., Byrnes, J., Noto, K., Kermany, A.R.,  
831 Myres, N.M., Barber, M.J., et al. (2017). Clustering of 770,000 genomes reveals post-colonial  
832 population structure of North America. *Nat Commun* 8, 14238. 10.1038/ncomms14238.
- 833 23. Dai, C.L., Vazifeh, M.M., Yeang, C.-H., Tachet, R., Wells, R.S., Vilar, M.G., Daly, M.J., Ratti, C., and  
834 Martin, A.R. (2020). Population Histories of the United States Revealed through Fine-Scale  
835 Migration and Haplotype Analysis. *The American Journal of Human Genetics* 106, 371-388.  
836 10.1016/j.ajhg.2020.02.002.
- 837 24. Denny, J.C., Bastarache, L., Ritchie, M.D., Carroll, R.J., Zink, R., Mosley, J.D., Field, J.R., Pulley,  
838 J.M., Ramirez, A.H., Bowton, E., et al. (2013). Systematic comparison of phenome-wide association  
839 study of electronic medical record data and genome-wide association study data. *Nat Biotechnol* 31,  
840 1102-1110. 10.1038/nbt.2749.
- 841 25. Hao, Y., Hao, S., Andersen-Nissen, E., Mauck, W.M., 3rd, Zheng, S., Butler, A., Lee, M.J., Wilk, A.J.,  
842 Darby, C., Zager, M., et al. (2021). Integrated analysis of multimodal single-cell data. *Cell* 184, 3573-  
843 3587 e3529. 10.1016/j.cell.2021.04.048.
- 844 26. Bergstrom, A., McCarthy, S.A., Hui, R., Almarri, M.A., Ayub, Q., Danecek, P., Chen, Y., Felkel, S.,  
845 Hallast, P., Kamm, J., et al. (2020). Insights into human genetic variation and population history from  
846 929 diverse genomes. *Science* 367. 10.1126/science.aay5012.
- 847 27. Auton, A., Abecasis, G.R., Altshuler, D.M., Durbin, R.M., Abecasis, G.R., Bentley, D.R., Chakravarti,  
848 A., Clark, A.G., Donnelly, P., Eichler, E.E., et al. (2015). A global reference for human genetic  
849 variation. *Nature* 526, 68-74. 10.1038/nature15393.
- 850 28. Koenig, Z., Yohannes, M.T., Nkambule, L.L., Goodrich, J.K., Kim, H.A., Zhao, X., Wilson, M.W., Tiao,  
851 G., Hao, S.P., Sahakian, N., et al. (2023). A harmonized public resource of deeply sequenced  
852 diverse human genomes. Cold Spring Harbor Laboratory.

- 853 29. Alexander, D.H., Novembre, J., and Lange, K. (2009). Fast model-based estimation of ancestry in  
854 unrelated individuals. *Genome Res* 19, 1655-1664. 10.1101/gr.094052.109.
- 855 30. Karczewski, K.J., Francioli, L.C., Tiao, G., Cummings, B.B., Alföldi, J., Wang, Q., Collins, R.L.,  
856 Laricchia, K.M., Ganna, A., Birnbaum, D.P., et al. (2020). The mutational constraint spectrum  
857 quantified from variation in 141,456 humans. *Nature* 581, 434-443. 10.1038/s41586-020-2308-7.
- 858 31. Laken, S.J., Petersen, G.M., Gruber, S.B., Oddoux, C., Ostrer, H., Giardiello, F.M., Hamilton, S.R.,  
859 Hampel, H., Markowitz, A., Klimstra, D., et al. (1997). Familial colorectal cancer in Ashkenazim due  
860 to a hypermutable tract in APC. *Nature Genetics* 17, 79-83. 10.1038/ng0997-79.
- 861 32. Levy-Lahad, E., Catane, R., Eisenberg, S., Kaufman, B., Hornreich, G., Lishinsky, E., Shohat, M.,  
862 Weber, B.L., Beller, U., Lahad, A., and Halle, D. (1997). Founder BRCA1 and BRCA2 mutations in  
863 Ashkenazi Jews in Israel: frequency and differential penetrance in ovarian cancer and in breast-  
864 ovarian cancer families. *Am J Hum Genet* 60, 1059-1067.
- 865 33. Salmela, E., Lappalainen, T., Fransson, I., Andersen, P.M., Dahlman-Wright, K., Fiebig, A., Sistonen,  
866 P., Savontaus, M.L., Schreiber, S., Kere, J., and Lahermo, P. (2008). Genome-wide analysis of  
867 single nucleotide polymorphisms uncovers population structure in Northern Europe. *PLoS One* 3,  
868 e3519. 10.1371/journal.pone.0003519.
- 869 34. Huyghe, J.R., Fransen, E., Hannula, S., Van Laer, L., Van Eyken, E., Maki-Torkko, E., Aikio, P.,  
870 Sorri, M., Huentelman, M.J., and Van Camp, G. (2011). A genome-wide analysis of population  
871 structure in the Finnish Saami with implications for genetic association studies. *Eur J Hum Genet* 19,  
872 347-352. 10.1038/ejhg.2010.179.
- 873 35. Lazaridis, I., Patterson, N., Mitnik, A., Renaud, G., Mallick, S., Kirsanow, K., Sudmant, P.H.,  
874 Schraiber, J.G., Castellano, S., Lipson, M., et al. (2014). Ancient human genomes suggest three  
875 ancestral populations for present-day Europeans. *Nature* 513, 409-413. 10.1038/nature13673.
- 876 36. Haak, W., Lazaridis, I., Patterson, N., Rohland, N., Mallick, S., Llamas, B., Brandt, G., Nordenfelt, S.,  
877 Harney, E., Stewardson, K., et al. (2015). Massive migration from the steppe was a source for Indo-  
878 European languages in Europe. *Nature* 522, 207-211. 10.1038/nature14317.
- 879 37. Carmi, S., Hui, K.Y., Kochav, E., Liu, X., Xue, J., Grady, F., Guha, S., Upadhyay, K., Ben-Avraham,  
880 D., Mukherjee, S., et al. (2014). Sequencing an Ashkenazi reference panel supports population-  
881 targeted personal genomics and illuminates Jewish and European origins. *Nature Communications* 5,  
882 4835. 10.1038/ncomms5835.
- 883 38. Browning, S.R., and Browning, B.L. (2007). Rapid and accurate haplotype phasing and missing-data  
884 inference for whole-genome association studies by use of localized haplotype clustering. *Am J Hum*  
885 *Genet* 81, 1084-1097. 10.1086/521987.
- 886 39. Browning, S.R., Browning, B.L., Daviglus, M.L., Durazo-Arvizu, R.A., Schneiderman, N., Kaplan,  
887 R.C., and Laurie, C.C. (2018). Ancestry-specific recent effective population size in the Americas.  
888 *PLoS Genet* 14, e1007385. 10.1371/journal.pgen.1007385.
- 889 40. Goff, D.C., Lloyd-Jones, D.M., Bennett, G., Coady, S., D'Agostino, R.B., Gibbons, R., Greenland, P.,  
890 Lackland, D.T., Levy, D., O'Donnell, C.J., et al. (2014). 2013 ACC/AHA Guideline on the  
891 Assessment of Cardiovascular Risk: A Report of the American College of Cardiology/American  
892 Heart Association Task Force on Practice Guidelines. *Journal of the American College of Cardiology*  
893 63, 2935-2959. <https://doi.org/10.1016/j.jacc.2013.11.005>.
- 894 41. Goff, D.C., Lloyd-Jones, D.M., Bennett, G., Coady, S., D'Agostino, R.B., Gibbons, R., Greenland, P.,  
895 Lackland, D.T., Levy, D., O'Donnell, C.J., et al. (2014). 2013 ACC/AHA Guideline on the  
896 Assessment of Cardiovascular Risk. *Circulation* 129, S49-S73.  
897 10.1161/01.cir.0000437741.48606.98.
- 898 42. A comprehensive 1000 Genomes-based genome-wide association meta-analysis of coronary artery  
899 disease. (2015). *Nature Genetics* 47, 1121-1130. 10.1038/ng.3396.



- 900 43. Miller, D.T., Lee, K., Abul-Husn, N.S., Amendola, L.M., Brothers, K., Chung, W.K., Gollob, M.H.,  
901 Gordon, A.S., Harrison, S.M., Hershberger, R.E., et al. (2022). ACMG SF v3.1 list for reporting of  
902 secondary findings in clinical exome and genome sequencing: A policy statement of the American  
903 College of Medical Genetics and Genomics (ACMG). *Genetics in Medicine* 24, 1407-1414.  
904 [10.1016/j.gim.2022.04.006](https://doi.org/10.1016/j.gim.2022.04.006).
- 905 44. Miller, D.T., Lee, K., Chung, W.K., Gordon, A.S., Herman, G.E., Klein, T.E., Stewart, D.R., Amendola,  
906 L.M., Adelman, K., Bale, S.J., et al. (2021). ACMG SF v3.0 list for reporting of secondary findings in  
907 clinical exome and genome sequencing: a policy statement of the American College of Medical  
908 Genetics and Genomics (ACMG). *Genet Med* 23, 1381-1390. [10.1038/s41436-021-01172-3](https://doi.org/10.1038/s41436-021-01172-3).
- 909 45. Landrum, M.J., Lee, J.M., Benson, M., Brown, G.R., Chao, C., Chitipiralla, S., Gu, B., Hart, J.,  
910 Hoffman, D., Jang, W., et al. (2018). ClinVar: improving access to variant interpretations and  
911 supporting evidence. *Nucleic Acids Res* 46, D1062-D1067. [10.1093/nar/gkx1153](https://doi.org/10.1093/nar/gkx1153).
- 912 46. Landrum, M.J., Lee, J.M., Riley, G.R., Jang, W., Rubinstein, W.S., Church, D.M., and Maglott, D.R.  
913 (2014). ClinVar: public archive of relationships among sequence variation and human phenotype.  
914 *Nucleic Acids Res* 42, D980-985. [10.1093/nar/gkt1113](https://doi.org/10.1093/nar/gkt1113).
- 915 47. Backman, J.D., Li, A.H., Marcketta, A., Sun, D., Mbatchou, J., Kessler, M.D., Benner, C., Liu, D.,  
916 Locke, A.E., Balasubramanian, S., et al. (2021). Exome sequencing and analysis of 454,787 UK  
917 Biobank participants. *Nature* 599, 628-634. [10.1038/s41586-021-04103-z](https://doi.org/10.1038/s41586-021-04103-z).
- 918 48. Jurgens, S.J., Choi, S.H., Morrill, V.N., Chaffin, M., Pirruccello, J.P., Halford, J.L., Weng, L.C.,  
919 Nauffal, V., Roselli, C., Hall, A.W., et al. (2022). Analysis of rare genetic variation underlying  
920 cardiometabolic diseases and traits among 200,000 individuals in the UK Biobank. *Nat Genet* 54,  
921 240-250. [10.1038/s41588-021-01011-w](https://doi.org/10.1038/s41588-021-01011-w).
- 922 49. Pilarski, R. (2019). PTEN Hamartoma Tumor Syndrome: A Clinical Overview. *Cancers (Basel)* 11.  
923 [10.3390/cancers11060844](https://doi.org/10.3390/cancers11060844).
- 924 50. Tischkowitz, M., Colas, C., Pouwels, S., Hoogerbrugge, N., Group, P.G.D., and European Reference  
925 Network, G. (2020). Cancer Surveillance Guideline for individuals with PTEN hamartoma tumour  
926 syndrome. *Eur J Hum Genet* 28, 1387-1393. [10.1038/s41431-020-0651-7](https://doi.org/10.1038/s41431-020-0651-7).
- 927 51. Taliun, D., Harris, D.N., Kessler, M.D., Carlson, J., Szpiech, Z.A., Torres, R., Taliun, S.A.G., Corvelo,  
928 A., Gogarten, S.M., Kang, H.M., et al. (2021). Sequencing of 53,831 diverse genomes from the  
929 NHLBI TOPMed Program. *Nature* 590, 290-299. [10.1038/s41586-021-03205-y](https://doi.org/10.1038/s41586-021-03205-y).
- 930 52. Huang, L., Rosen, J.D., Sun, Q., Chen, J., Wheeler, M.M., Zhou, Y., Min, Y.-I., Kooperberg, C.,  
931 Conomos, M.P., Stilp, A.M., et al. (2022). TOP-LD: A tool to explore linkage disequilibrium with  
932 TOPMed whole-genome sequence data. *The American Journal of Human Genetics* 109, 1175-1181.  
933 [10.1016/j.ajhg.2022.04.006](https://doi.org/10.1016/j.ajhg.2022.04.006).
- 934 53. Genetic effects on gene expression across human tissues. (2017). *Nature* 550, 204-213.  
935 [10.1038/nature24277](https://doi.org/10.1038/nature24277).
- 936 54. Butler, D.C., Petterson, S., Phillips, R.L., and Bazemore, A.W. (2013). Measures of social  
937 deprivation that predict health care access and need within a rural area of primary care service  
938 delivery. *Health Serv Res* 48, 539-559. [10.1111/j.1475-6773.2012.01449.x](https://doi.org/10.1111/j.1475-6773.2012.01449.x).
- 939 55. Kimenai, D.M., Pirondini, L., Gregson, J., Prieto, D., Pocock, S.J., Perel, P., Hamilton, T., Welsh, P.,  
940 Campbell, A., Porteous, D.J., et al. (2022). Socioeconomic Deprivation: An Important, Largely  
941 Unrecognized Risk Factor in Primary Prevention of Cardiovascular Disease. *Circulation* 146, 240-  
942 248. [10.1161/CIRCULATIONAHA.122.060042](https://doi.org/10.1161/CIRCULATIONAHA.122.060042).
- 943 56. Schultz, W.M., Kelli, H.M., Lisko, J.C., Varghese, T., Shen, J., Sandesara, P., Quyyumi, A.A., Taylor,  
944 H.A., Gulati, M., Harold, J.G., et al. (2018). Socioeconomic Status and Cardiovascular Outcomes:  
945 Challenges and Interventions. *Circulation* 137, 2166-2178. [10.1161/CIRCULATIONAHA.117.029652](https://doi.org/10.1161/CIRCULATIONAHA.117.029652).

- 946 57. Bann, D., Wright, L., Hardy, R., Williams, D.M., and Davies, N.M. (2022). Polygenic and  
947 socioeconomic risk for high body mass index: 69 years of follow-up across life. *PLoS Genet* 18,  
948 e1010233. [10.1371/journal.pgen.1010233](https://doi.org/10.1371/journal.pgen.1010233).
- 949 58. Cromer, S.J., Lakhani, C.M., Mercader, J.M., Majarian, T.D., Schroeder, P., Cole, J.B., Florez, J.C.,  
950 Patel, C.J., Manning, A.K., Burnett-Bowie, S.M., Merino, J., and Udler, M.S. (2023). Association and  
951 Interaction of Genetics and Area-Level Socioeconomic Factors on the Prevalence of Type 2  
952 Diabetes and Obesity. *Diabetes Care* 46, 944-952. [10.2337/dc22-1954](https://doi.org/10.2337/dc22-1954).
- 953 59. Mostafavi, H., Harpak, A., Agarwal, I., Conley, D., Pritchard, J.K., and Przeworski, M. (2020).  
954 Variable prediction accuracy of polygenic scores within an ancestry group. *Elife* 9.  
955 [10.7554/eLife.48376](https://doi.org/10.7554/eLife.48376).
- 956 60. He, Y., Qian, D.C., Diao, J.A., Cho, M.H., Silverman, E.K., Gusev, A., Manrai, A.K., Martin, A.R., and  
957 Patel, C.J. (2023). Prediction and stratification of longitudinal risk for chronic obstructive pulmonary  
958 disease across smoking behaviors. *medRxiv*. [10.1101/2023.04.04.23288086](https://doi.org/10.1101/2023.04.04.23288086).
- 959 61. Martin, A.R., Kanai, M., Kamatani, Y., Okada, Y., Neale, B.M., and Daly, M.J. (2019). Clinical use of  
960 current polygenic risk scores may exacerbate health disparities. *Nat Genet* 51, 584-591.  
961 [10.1038/s41588-019-0379-x](https://doi.org/10.1038/s41588-019-0379-x).
- 962 62. Flegel, W.A. (2007). The genetics of the Rhesus blood group system. *Blood Transfus* 5, 50-57.  
963 [10.2450/2007.0011-07](https://doi.org/10.2450/2007.0011-07).
- 964 63. Lee, Y.H., Thaweethai, T., Sheu, Y.H., Feng, Y.A., Karlson, E.W., Ge, T., Kraft, P., and Smoller, J.W.  
965 (2023). Impact of selection bias on polygenic risk score estimates in healthcare settings. *Psychol*  
966 *Med*, 1-11. [10.1017/s0033291723001186](https://doi.org/10.1017/s0033291723001186).
- 967 64. Boutin, N., Mathieu, K., Hoffnagle, A., Allen, N., Castro, V., Morash, M., O'Rourke, P., Hohmann, E.,  
968 Herring, N., Bry, L., et al. (2016). Implementation of Electronic Consent at a Biobank: An Opportunity  
969 for Precision Medicine Research. *Journal of Personalized Medicine* 6, 17. [10.3390/jpm6020017](https://doi.org/10.3390/jpm6020017).
- 970 65. Goldstein, J.I., Crenshaw, A., Carey, J., Grant, G.B., Maguire, J., Fromer, M., O'Dushlaine, C.,  
971 Moran, J.L., Chambert, K., Stevens, C., et al. (2012). zCall: a rare variant caller for array-based  
972 genotyping: genetics and population analysis. *Bioinformatics* 28, 2543-2545.  
973 [10.1093/bioinformatics/bts479](https://doi.org/10.1093/bioinformatics/bts479).
- 974 66. Altschul, S.F., Gish, W., Miller, W., Myers, E.W., and Lipman, D.J. (1990). Basic local alignment  
975 search tool. *J Mol Biol* 215, 403-410. [10.1016/s0022-2836\(05\)80360-2](https://doi.org/10.1016/s0022-2836(05)80360-2).
- 976 67. Das, S., Forer, L., Schonherr, S., Sidore, C., Locke, A.E., Kwong, A., Vrieze, S.I., Chew, E.Y., Levy,  
977 S., McGue, M., et al. (2016). Next-generation genotype imputation service and methods. *Nat Genet*  
978 48, 1284-1287. [10.1038/ng.3656](https://doi.org/10.1038/ng.3656).
- 979 68. Loh, P.R., Palamara, P.F., and Price, A.L. (2016). Fast and accurate long-range phasing in a UK  
980 Biobank cohort. *Nat Genet* 48, 811-816. [10.1038/ng.3571](https://doi.org/10.1038/ng.3571).
- 981 69. Das, S., Forer, L., Schön herr, S., Sidore, C., Locke, A.E., Kwong, A., Vrieze, S.I., Chew, E.Y., Levy,  
982 S., McGue, M., et al. (2016). Next-generation genotype imputation service and methods. *Nature*  
983 *Genetics* 48, 1284-1287. [10.1038/ng.3656](https://doi.org/10.1038/ng.3656).
- 984 70. Danecek, P., Auton, A., Abecasis, G., Albers, C.A., Banks, E., DePristo, M.A., Handsaker, R.E.,  
985 Lunter, G., Marth, G.T., Sherry, S.T., et al. (2011). The variant call format and VCFtools.  
986 *Bioinformatics* 27, 2156-2158. [10.1093/bioinformatics/btr330](https://doi.org/10.1093/bioinformatics/btr330).
- 987 71. Chang, C.C., Chow, C.C., Tellier, L.C., Vattikuti, S., Purcell, S.M., and Lee, J.J. (2015). Second-  
988 generation PLINK: rising to the challenge of larger and richer datasets. *Gigascience* 4, 7.  
989 [10.1186/s13742-015-0047-8](https://doi.org/10.1186/s13742-015-0047-8).
- 990 72. McKenna, A., Hanna, M., Banks, E., Sivachenko, A., Cibulskis, K., Kernysky, A., Garimella, K.,  
991 Althuler, D., Gabriel, S., Daly, M., and DePristo, M.A. (2010). The Genome Analysis Toolkit: a

- 992 MapReduce framework for analyzing next-generation DNA sequencing data. *Genome research* 20,  
993 1297-1303. 10.1101/gr.107524.110.
- 994 73. The Hail Team. Hail. <https://github.com/hail-is/hail>.
- 995 74. Conomos, M.P., Reiner, A.P., Weir, B.S., and Thornton, T.A. (2016). Model-free Estimation of  
996 Recent Genetic Relatedness. *Am J Hum Genet* 98, 127-148. 10.1016/j.ajhg.2015.11.022.
- 997 75. Saitou, N., and Nei, M. (1987). The neighbor-joining method: a new method for reconstructing  
998 phylogenetic trees. *Molecular Biology and Evolution* 4, 406-425.  
999 10.1093/oxfordjournals.molbev.a040454.
- 1000 76. Paradis, E., and Schliep, K. (2019). ape 5.0: an environment for modern phylogenetics and  
1001 evolutionary analyses in R. *Bioinformatics* 35, 526-528. 10.1093/bioinformatics/bty633.
- 1002 77. Zhou, Y., Browning, S.R., and Browning, B.L. (2020). A Fast and Simple Method for Detecting  
1003 Identity-by-Descent Segments in Large-Scale Data. *The American Journal of Human Genetics* 106,  
1004 426-437. 10.1016/j.ajhg.2020.02.010.
- 1005 78. Browning, S.R., and Browning, B.L. (2015). Accurate Non-parametric Estimation of Recent Effective  
1006 Population Size from Segments of Identity by Descent. *The American Journal of Human Genetics* 97,  
1007 404-418. 10.1016/j.ajhg.2015.07.012.
- 1008 79. McLaren, W., Gil, L., Hunt, S.E., Riat, H.S., Ritchie, G.R., Thormann, A., Flicek, P., and Cunningham,  
1009 F. (2016). The Ensembl Variant Effect Predictor. *Genome Biol* 17, 122. 10.1186/s13059-016-0974-4.
- 1010 80. Liu, X., Li, C., Mou, C., Dong, Y., and Tu, Y. (2020). dbNSFP v4: a comprehensive database of  
1011 transcript-specific functional predictions and annotations for human nonsynonymous and splice-site  
1012 SNVs. *Genome Med* 12, 103. 10.1186/s13073-020-00803-9.
- 1013 81. Cingolani, P., Platts, A., Wang le, L., Coon, M., Nguyen, T., Wang, L., Land, S.J., Lu, X., and Ruden,  
1014 D.M. (2012). A program for annotating and predicting the effects of single nucleotide polymorphisms,  
1015 SnpEff: SNPs in the genome of *Drosophila melanogaster* strain w1118; iso-2; iso-3. *Fly (Austin)* 6,  
1016 80-92. 10.4161/fly.19695.
- 1017 82. Ge, T., Chen, C.Y., Ni, Y., Feng, Y.A., and Smoller, J.W. (2019). Polygenic prediction via Bayesian  
1018 regression and continuous shrinkage priors. *Nat Commun* 10, 1776. 10.1038/s41467-019-09718-5.
- 1019 83. Carroll, R.J., Bastarache, L., and Denny, J.C. (2014). R PheWAS: data analysis and plotting tools for  
1020 phenome-wide association studies in the R environment. *Bioinformatics* 30, 2375-2376.  
1021 10.1093/bioinformatics/btu197.
- 1022 84. Yadlowsky, S., Hayward, R.A., Sussman, J.B., McClelland, R.L., Min, Y.-I., and Basu, S. (2018).  
1023 Clinical Implications of Revised Pooled Cohort Equations for Estimating Atherosclerotic  
1024 Cardiovascular Disease Risk. *Annals of Internal Medicine* 169, 20-29. 10.7326/M17-3011.
- 1025 85. van Buuren, S., and Groothuis-Oudshoorn, K. (2011). mice: Multivariate Imputation by Chained  
1026 Equations in R. *Journal of Statistical Software* 45, 1 - 67. 10.18637/jss.v045.i03.
- 1027 86. Mbatchou, J., Barnard, L., Backman, J., Marcketta, A., Kosmicki, J.A., Ziyatdinov, A., Benner, C.,  
1028 O'Dushlaine, C., Barber, M., Boutkov, B., et al. (2021). Computationally efficient whole-genome  
1029 regression for quantitative and binary traits. *Nat Genet* 53, 1097-1103. 10.1038/s41588-021-00870-7.
- 1030 87. Bulik-Sullivan, B.K., Loh, P.-R., Finucane, H.K., Ripke, S., Yang, J., Patterson, N., Daly, M.J., Price,  
1031 A.L., and Neale, B.M. (2015). LD Score regression distinguishes confounding from polygenicity in  
1032 genome-wide association studies. *Nature Genetics* 47, 291-295. 10.1038/ng.3211.
- 1033 88. Brokamp, C., Wolfe, C., Lingren, T., Harley, J., and Ryan, P. (2018). Decentralized and reproducible  
1034 geocoding and characterization of community and environmental exposures for multisite studies. *J*  
1035 *Am Med Inform Assoc* 25, 309-314. 10.1093/jamia/ocx128.

- 1036 89. Kulldorff, M. (1997). A spatial scan statistic. *Communications in Statistics - Theory and Methods* 26,  
1037 1481-1496. [10.1080/03610929708831995](https://doi.org/10.1080/03610929708831995).

Figure 1

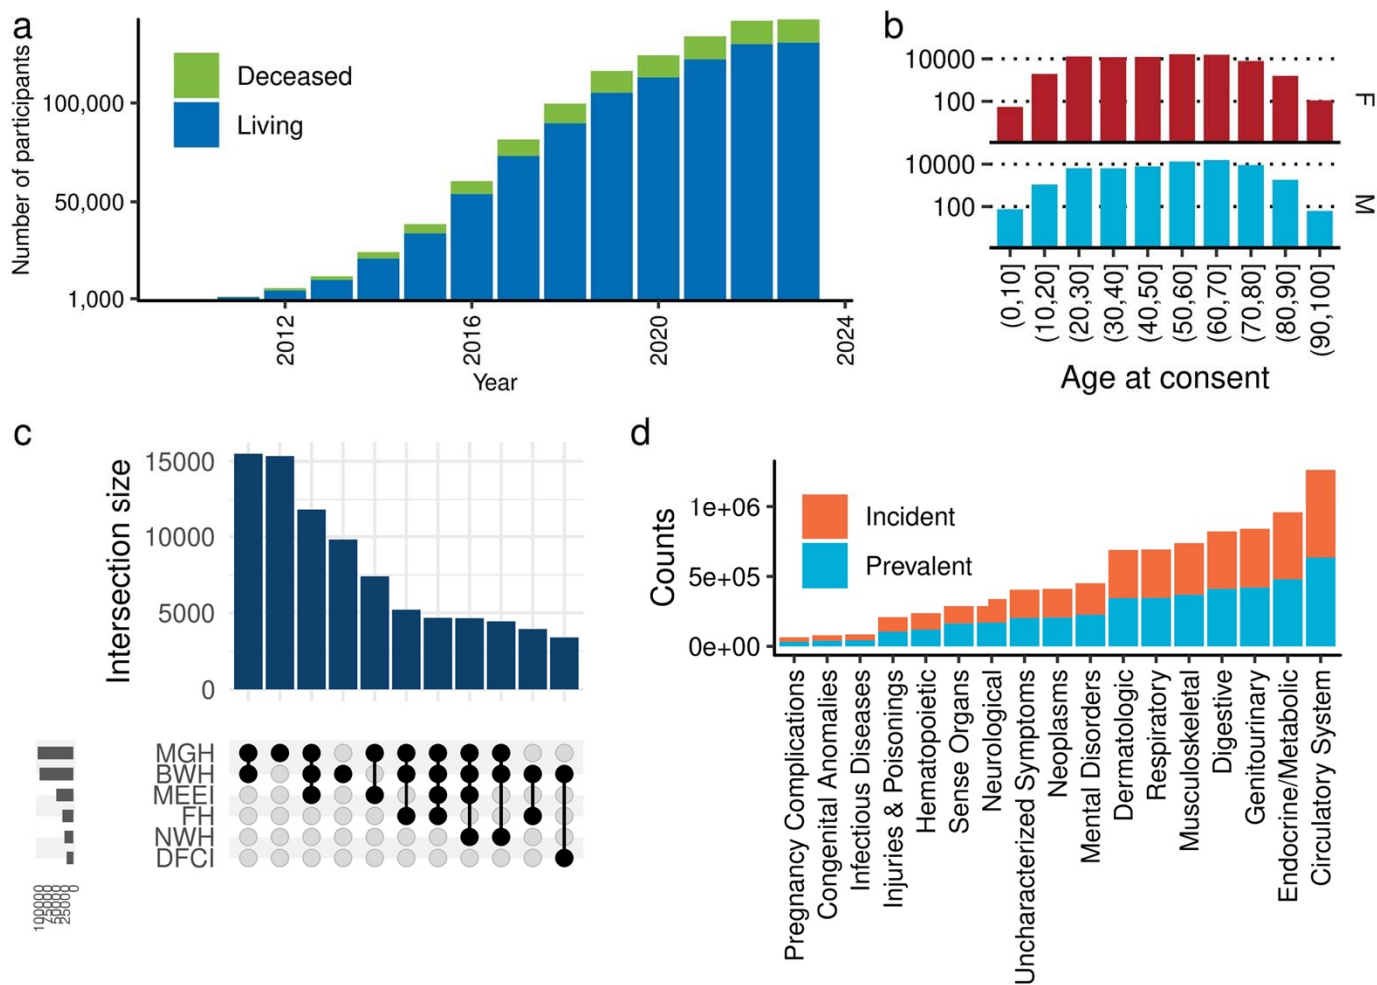

Figure 2

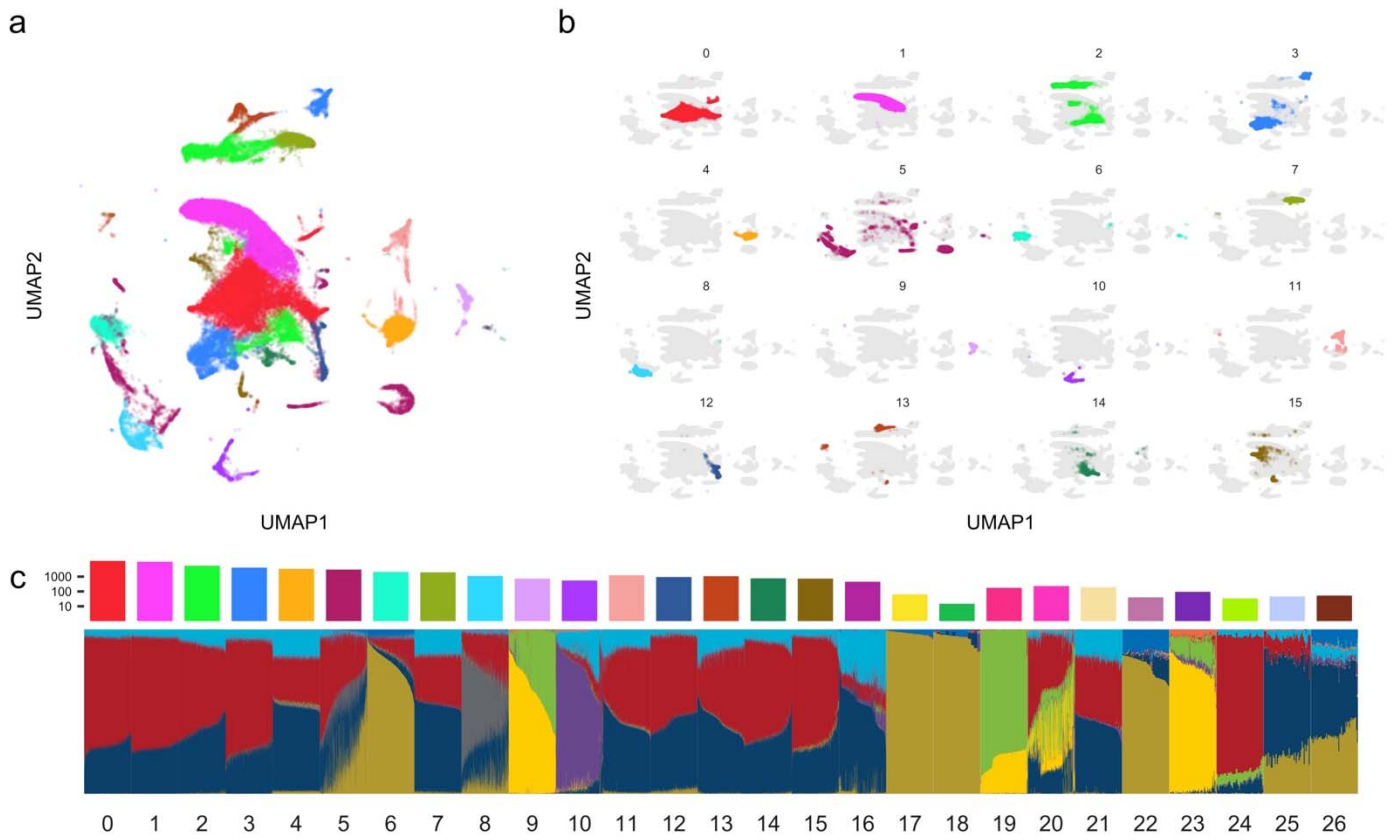

Figure 3

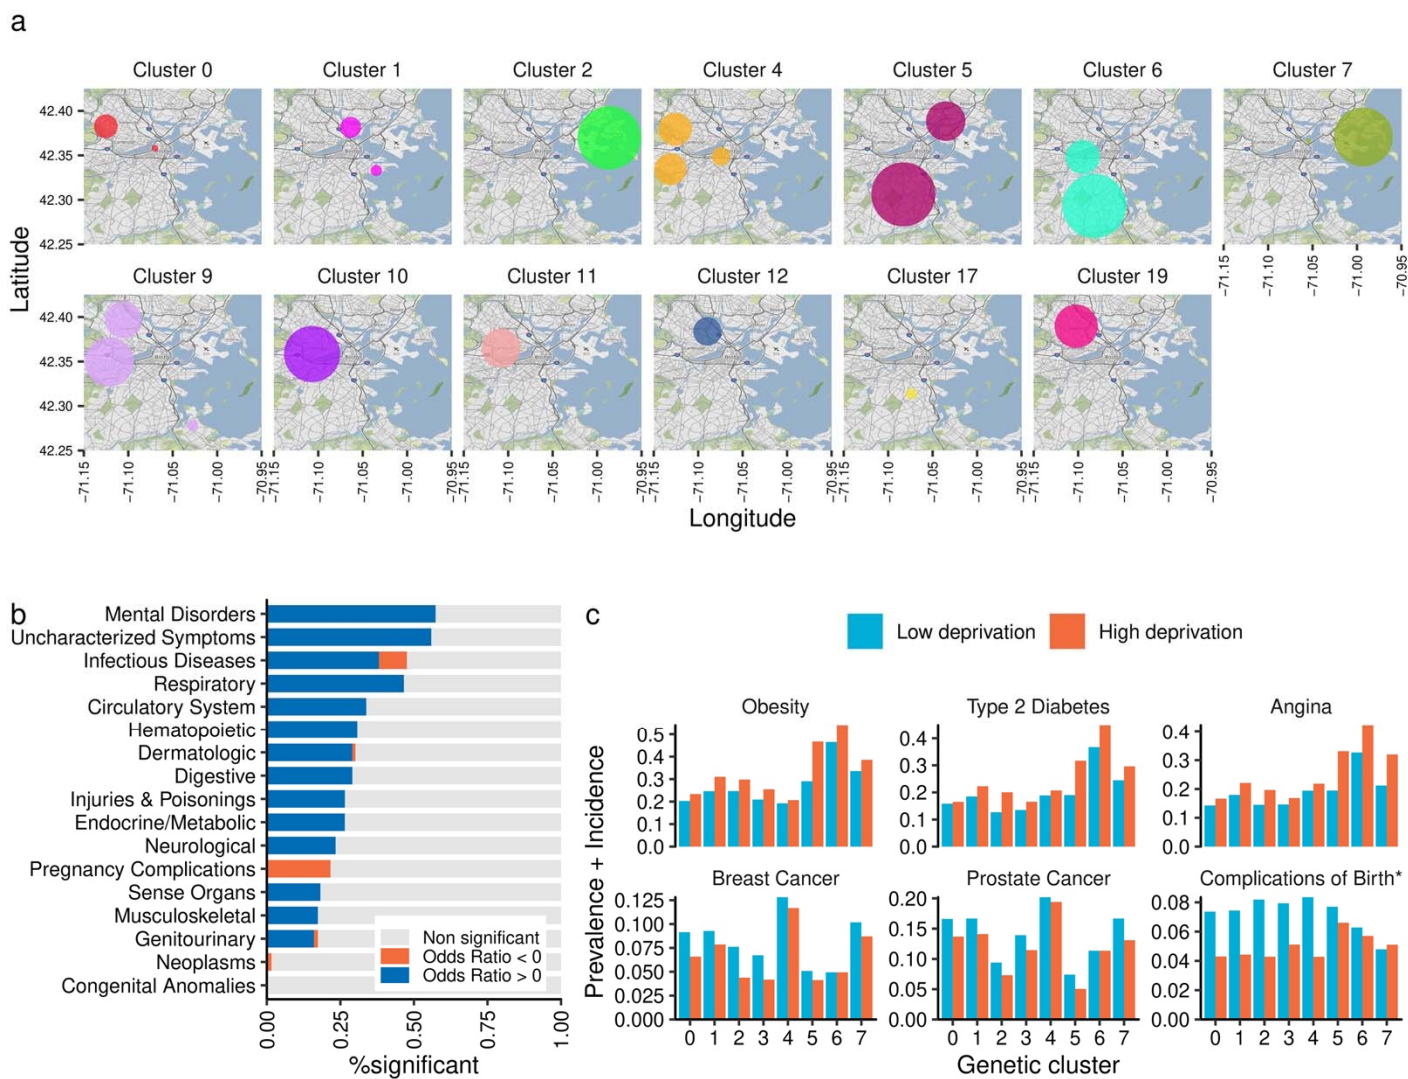

Figure 4

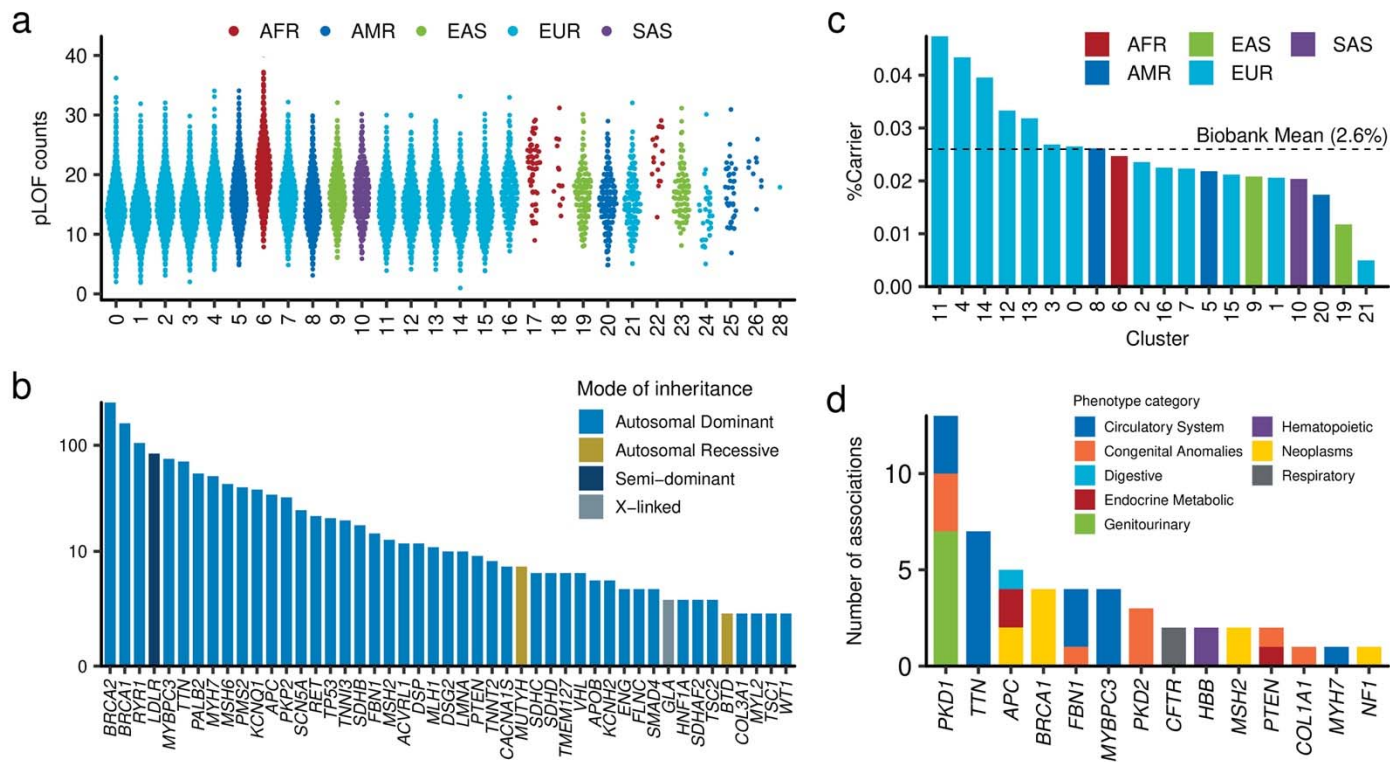



Figure 5

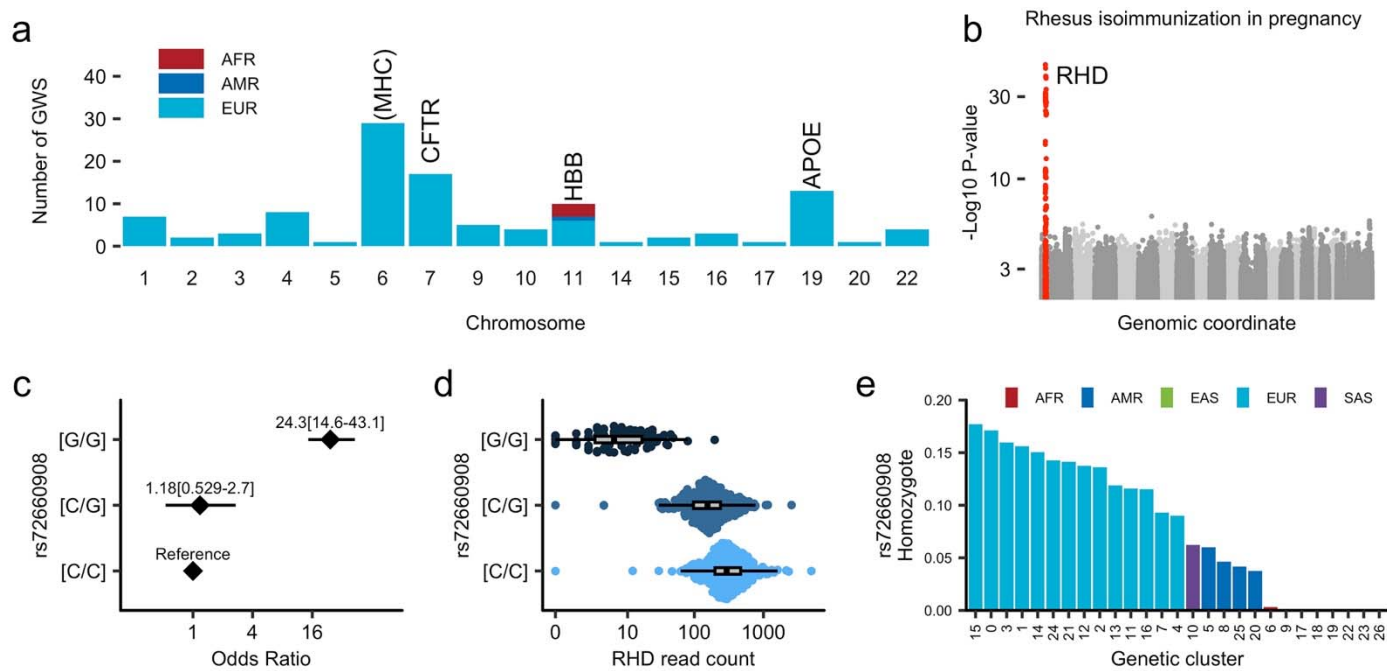

Figure S1

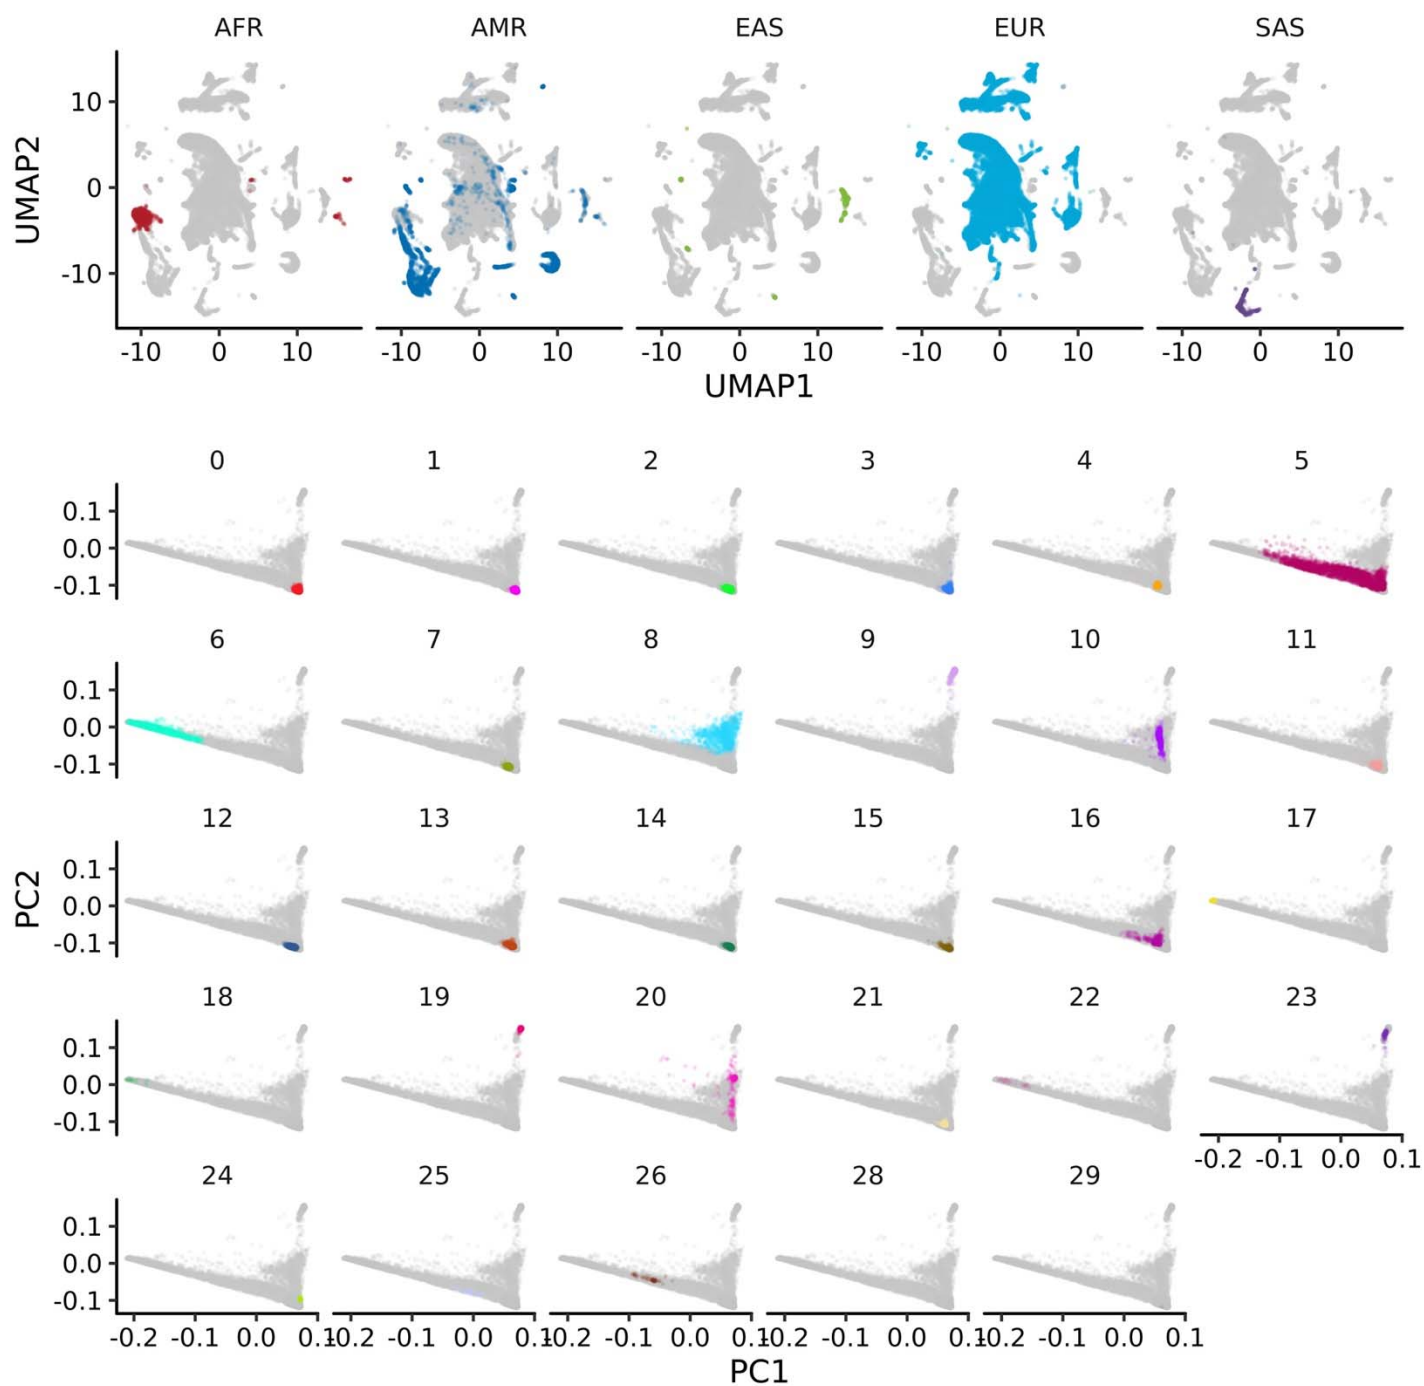

Figure S2

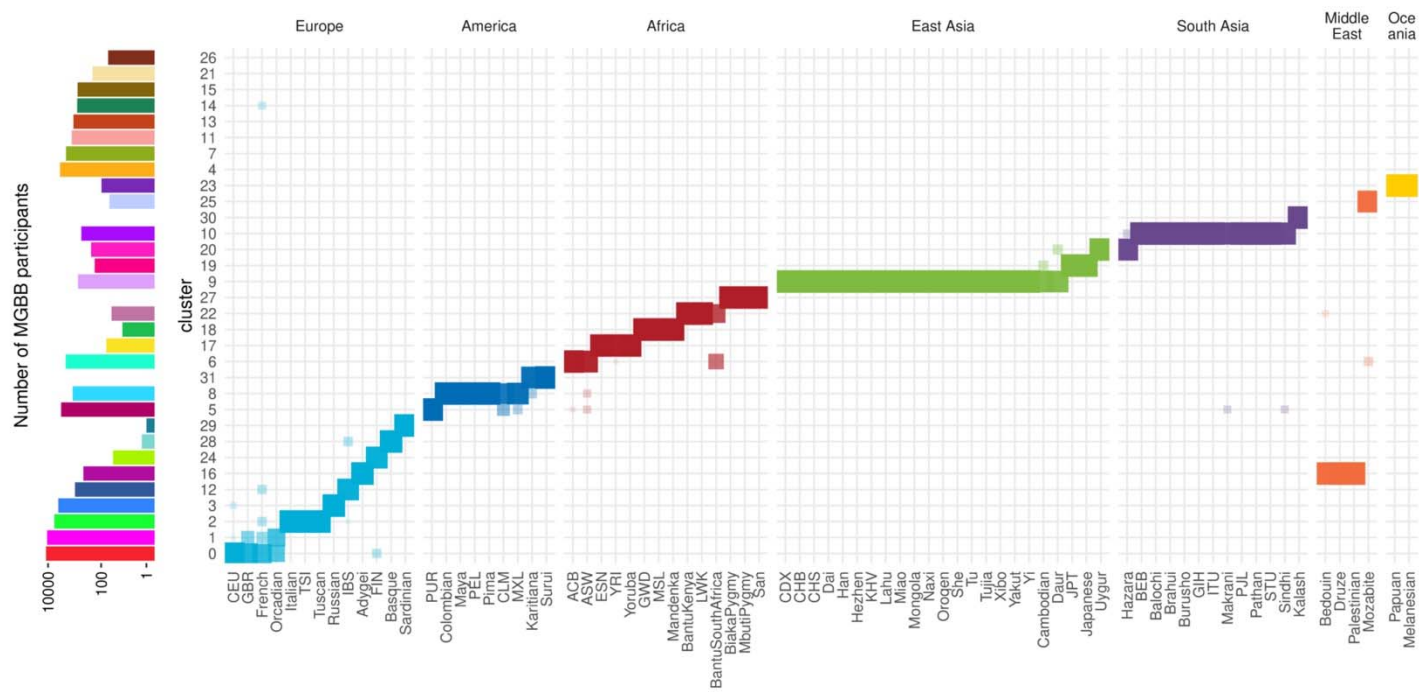



Figure S4

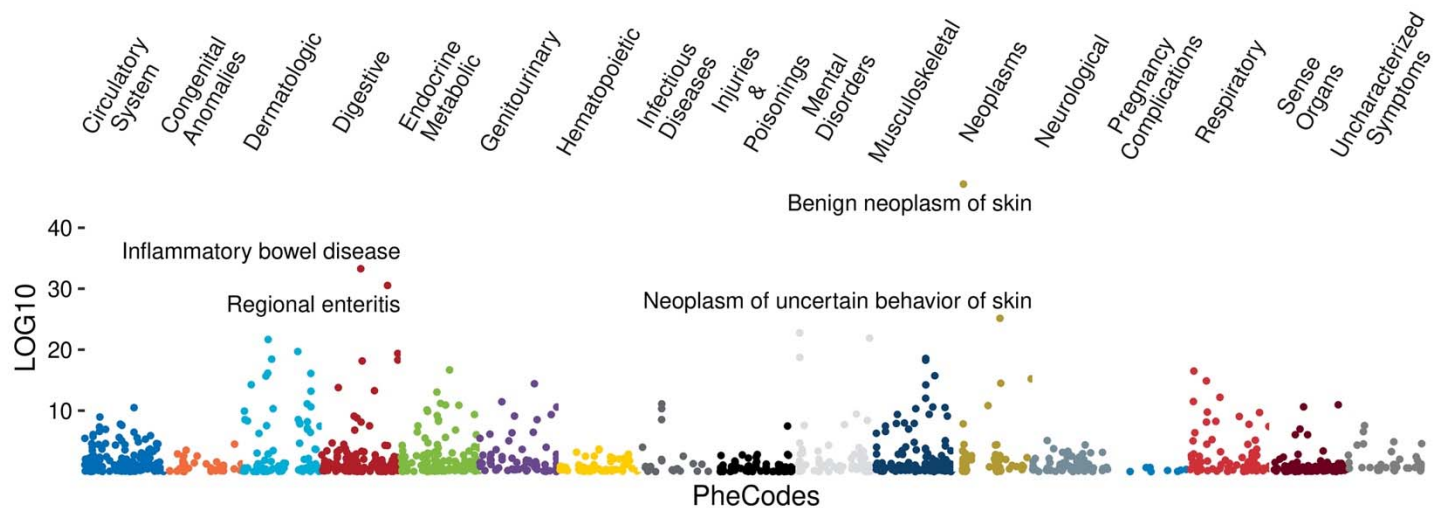

Figure S5

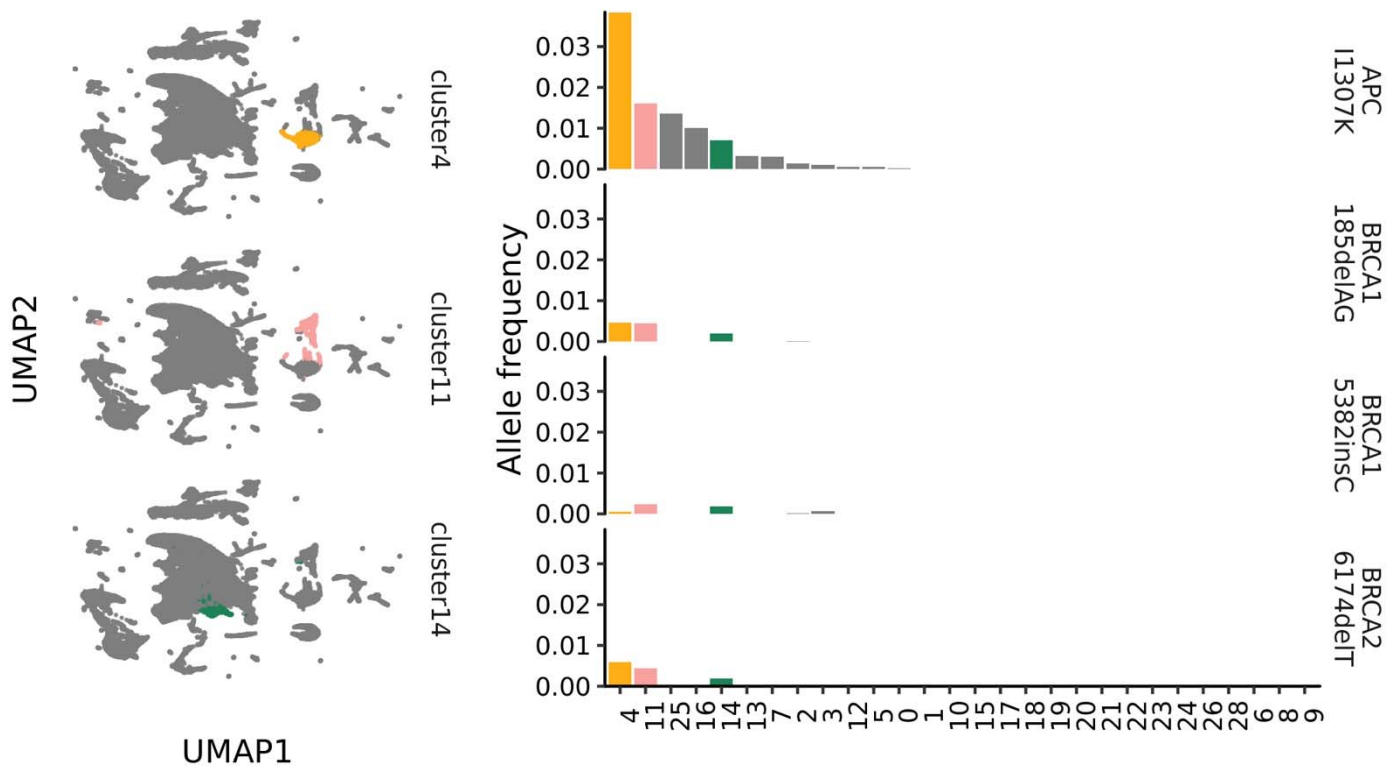

Figure S6

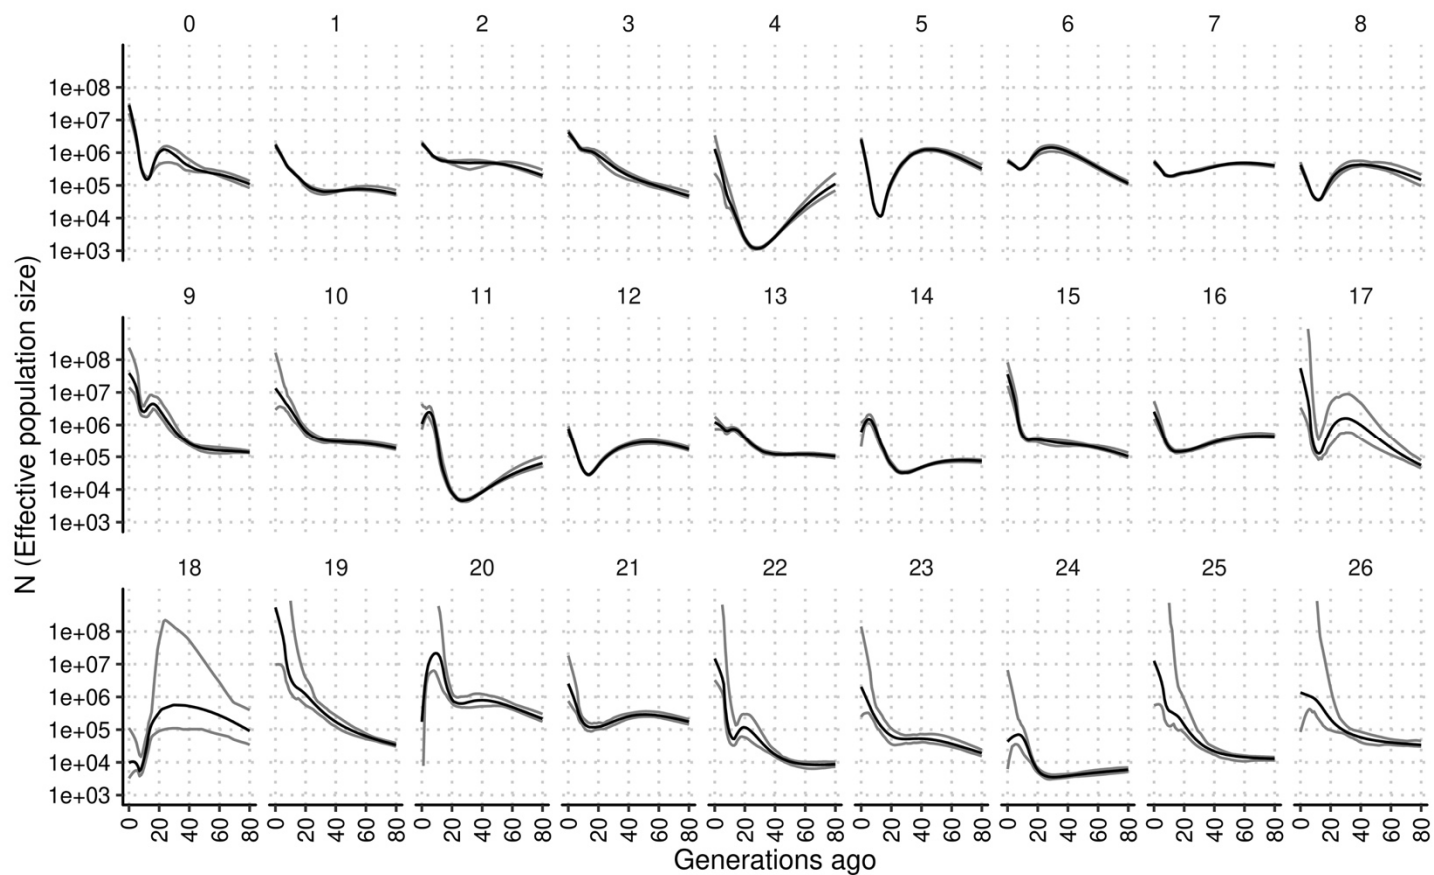

Figure S7

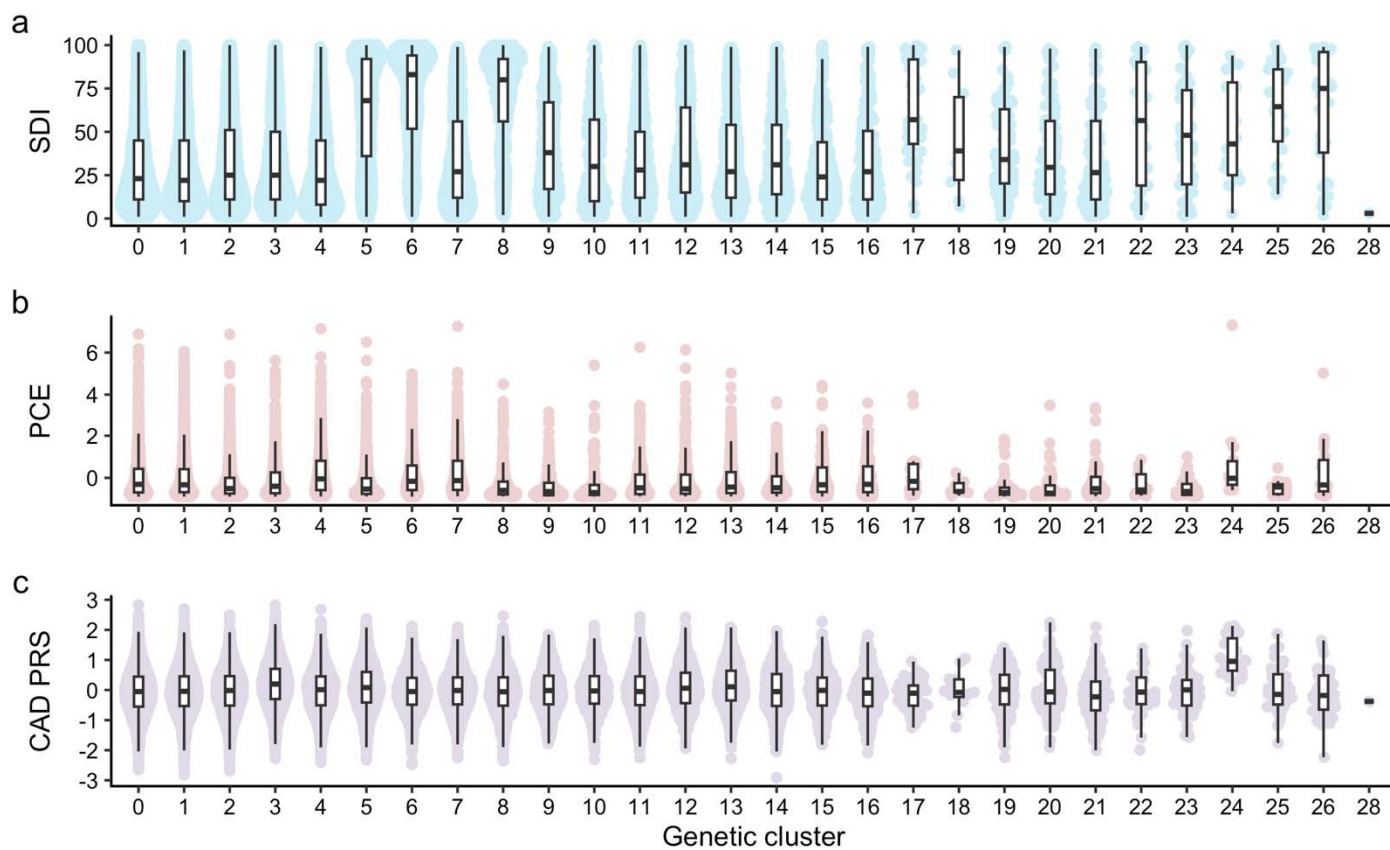



Figure S8

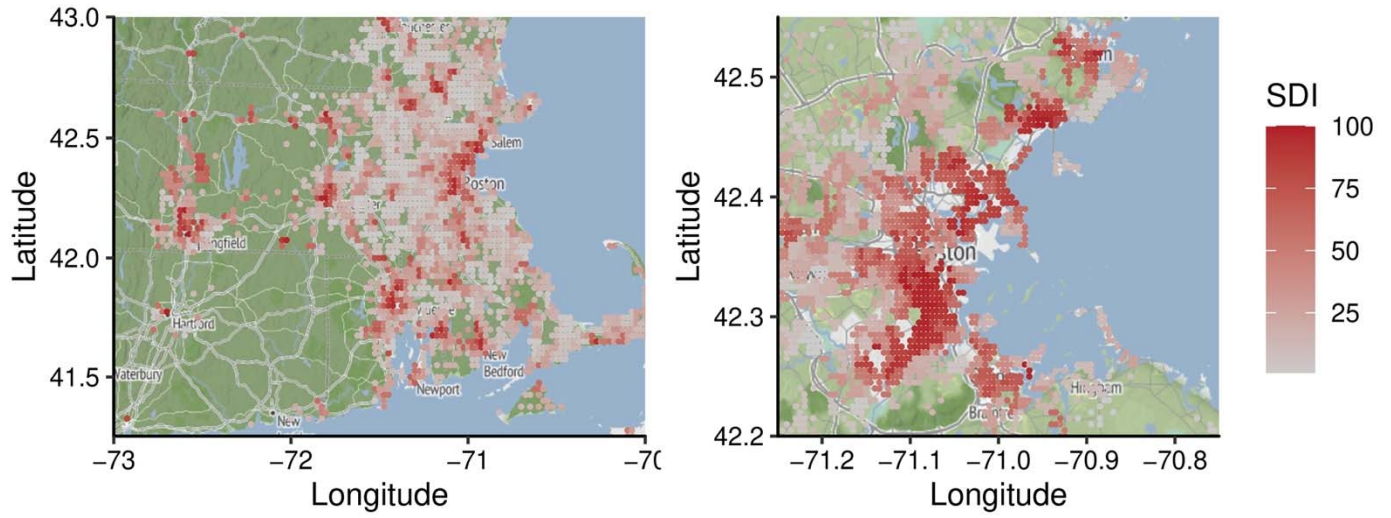

Figure S9

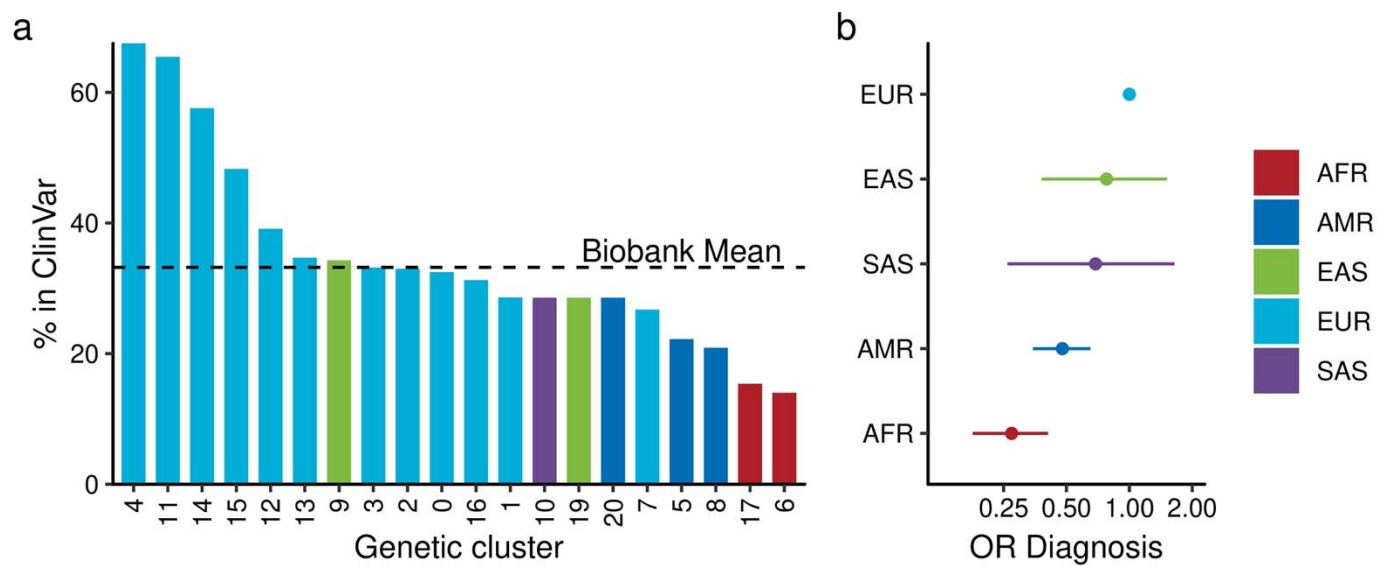

Figure S10

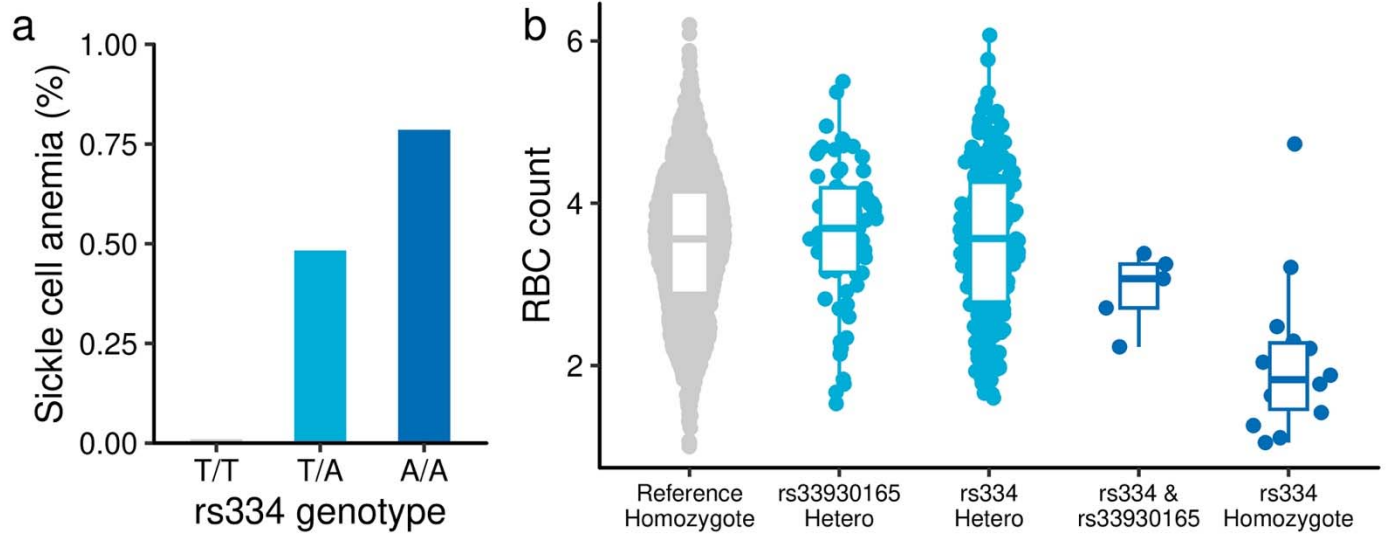

Source: https://medrxiv.org/content/10.1101/2023.10.24.23297096.full.pdf
